# Supplementary material for: Fecal Metabolomics Reveals the Foraging Strategies of Giant Pandas for Different Parts of Bamboo
Source: Animals (Basel). 2023 Apr 7;13(8):1278. doi: 10.3390/ani13081278 (PMC10135075; doi:10.3390/ani13081278)
Supplement: Supplementary file 1 [file animals-13-01278-s001.zip › supporting information Table S1-S7.xlsx]

## Sheet: S1
Table S1 Information of subjects and fecal samples of giant pandas
Group (part of bamboo food)）	Sample number	Sampling date	Giant Panda Studbook No.	Name	Sex	Date of Birth
SHOOT	Shoot1	2016.10.12	574	QIU BANG	M	2003.9.8
	Shoot2	2016.10.13	614	XING BANG	M	2005.8.23
	Shoot3	2016.10.13	680	XING RONG	F	2007.8.13
	Shoot4	2016.10.14	665	XIANG BING	F	2007.6.30
	Shoot5	2016.10.14	717	SHU XIANG	M	2008.8.4
	Shoot6	2016.10.14	731	XI LAN	M	2008.8.30
	Shoot7	2010.10.17	663	AI BANG	F	2006.12.23
	Shoot8	2016.10.19	573	LONG BANG	M	2003.9.8
	Shoot9	2016.10.19	624	QIAO QIAO	M	2004
LEAF	Leaf1	2016.11.10	532	FU FU	M	2001.8.25
	Leaf2	2016.11.11	624	QIAO QIAO	M	2004
	Leaf3	2016.11.24	663	AI BANG	F	2006.12.23
	Leaf4	2017.01.06	480	SHU QING	F	1999.8.3
	Leaf5	2017.01.09	738	YONG BANG	M	2008.9.13
	Leaf6	2017.01.10	711	GONG ZAI	M	2008.7.26
	Leaf7	2017.01.11	574	QIU BANG	M	2003.9.8
	Leaf8	2017.01.18	584	YONG YONG	M	2004.8.26
	Leaf9	2017.01.20	680	XING RONG	F	2007.8.13
CULM	Culm1	2017.03.15	554	YA SHUANG	F	2002.8.28
	Culm2	2017.03.16	574	QIU BANG	M	2003.9.8
	Culm3	2017.03.21	614	XING BANG	M	2005.8.23
	Culm4	2017.03.22	652	MENG MENG	F	2006.9.13
	Culm5	2017.03.22	663	AI BANG	F	2006.12.23
	Culm6	2017.03.22	765	BEI CHUAN	F	~2006+/-2yr
	Culm7	2017.03.28	680	XING RONG	F	2007.8.13
	Culm8	2017.03.28	593	SI YUAN	F	2004.10.22
	Culm9	2017.03.29	540	XIONG BANG	M	2001.12.17

## Sheet: S2
Table S2 Significant differential metabolites based on untargeted metabolomics
number	name	adduct	description
1	M84T755	(M+H-H2O)+	1-Aminocyclopropanecarboxylic acid
2	M116T580	(M+H)+	D-Proline
3	M245T334	(M+H)+	Ile-Ile
4	M134T767	(M+H)+	L-Aspartate
5	M174T746	(M-H)-	L-Citrulline
6	M231T361	(M+H)+	Leu-Val
7	M147T711	(M+H)+	L-Glutamine
8	M130T515	(M-H)-	L-Leucine
9	M164T479	(M-H)-	L-Phenylalanine
10	M205T471	(M+H)+	L-Tryptophan
11	M182T558	(M+H)+	L-Tyrosine
12	M233T460_2	(M+H)+	Thr-Leu
13	M217T395	(M+H)+	Val-Val
14	M146T770_2	(M-H)-	L-Glutamate
15	M130T755	(M+H)+	L-Pyroglutamic acid
16	M104T701	(M+H)+	4-Aminobutyric acid
17	M146T670	(M+H)+	4-Guanidinobutyric acid
18	M137T334	(M-H)-	4-Hydroxybenzoate
19	M172T367	(M-H)-	Acetyl-DL-Leucine
20	M165T204	(M-H)-	DL-3-Phenyllactic acid
21	M166T692	(M+H)+	DL-Methionine sulfoxide
22	M217T692	(M+H)+	N-.alpha.-Acetyl-L-arginine
23	M93T335	(M-H)-	Phenol
24	M173T692_2	(M-H)-	Shikimate
25	M298T131	(M+H)+	S-Methyl-5'-thioadenosine
26	M120T467_2	(M+H-H2O)+	Tyramine
27	M451T287	(M+CH3COO)-	Chenodeoxycholate
28	M498T259	(M-H)-	Taurochenodeoxycholate
29	M514T383	(M-H)-	Taurocholate
30	M517T191	(M+NH4)+	Taurodeoxycholic acid
31	M482T194	(M+H-H2O)+	Tauroursodeoxycholic acid
32	M237T715	(M+CH3COO)-	2-Dehydro-3-deoxy-D-gluconate
33	M132T651_2	(M+H)+	Creatine
34	M89T452	(M-H)-	DL-lactate
35	M455T73	(M-H)-	Flavin mononucleotide (FMN)
36	M117T758_2	(M-H)-	Succinate
37	M328T119	M+	(4Z,7Z,10Z,13Z,16Z,19Z)-4,7,10,13,1 6,19-Docosahexaenoic acid
38	M321T76	(M+H)+	20-Hydroxyarachidonic acid
39	M147T54	(M+H-H2O)+	2-Phenylbutyric acid
40	M277T84_2	(M-H)-	all cis-(6,9,12)-Linolenic acid
41	M555T84_4	(2M-H)-	alpha-Linolenic acid
42	M303T80	(M-H)-	Arachidonic Acid (peroxide free)
43	M253T85_2	(M-H)-	cis-9-Palmitoleic acid
44	M279T83_6	(M-H)-	Linoleic acid
45	M227T87	(M-H)-	Myristic acid
46	M283T77	(M+H)+	Oleic acid
47	M255T85	(M-H)-	Palmitic acid
48	M343T72_2	(M+CH3COO+2H)+	trans-Vaccenic acid
49	M115T168	(M-H)-	Caproic acid
50	M188T471	(M+H-H2O)+	DL-Indole-3-lactic acid
51	M285T91	(M-H)-	Kaempferol
52	M249T140	(M-H)-	Gamma-Glutamylcysteine
53	M258T729	M+	Glycerophosphocholine
54	M118T500	(M+H)+	Betaine
55	M204T571	(M+H)+	Acetylcarnitine
56	M452T369	(M-H)-	1-Palmitoyl-2-hydroxy-sn-glycero-3-phosphoethanolamine
57	M518T354	(M+Na)+	1-Palmitoyl-sn-glycero-3-phosphocholine
58	M153T144	(M+H)+	N1-Methyl-2-pyridone-5-carboxamide
59	M268T303	(M+H)+	Adenosine
60	M177T678	(M+H)+	Allantoate/Allantoic acid
61	M157T338	(M-H)-	Allantoin
62	M252T249	(M+H)+	Deoxyadenosine
63	M135T317	(M-H)-	Hypoxanthine
64	M241T187	(M-H)-	Thymidine
65	M127T130	(M+H)+	Thymine
66	M111T161_2	(M-H)-	Uracil
67	M243T300	(M-H)-	Uridine
68	M153T388	(M+H)+	Xanthine
69	M187T676_2	(M-H)-	Azelaic acid
70	M87T701	(M+H-H2O)+	DL-3-Hydroxybutyric acid
71	M163T321_2	(M-H)-	4-Hydroxycinnamic acid
72	M165T558	(M+H)+	trans-2-Hydroxycinnamic acid
73	M151T71_3	(M-H)-	Vanillin
74	M191T661_1	(M-H)-	Quinate
75	M225T493	(M+H)+	3,5-Dimethoxy-4-hydroxycinnamic acid
76	M359T70	(M+H)+	Matairesinol
77	M325T738	(M+H-H2O)+	3.alpha.-Mannobiose
78	M179T585	(M-H)-	Alpha-D-Glucose
79	M331T291	(M+CH3COO)-	Arbutin
80	M360T738	(M+NH4)+	Cellobiose
81	M239T578	(M+CH3COO)-	D-Allose
82	M198T567	(M+NH4)+	D-Mannose
83	M179T505	(M-H)-	D-Fructose
84	M322T60	(M+H)+	.alpha.-Linolenoyl ethanolamide
85	M104T493_1	M+	Choline
86	M263T201	(M-H)-	(+)-Abscisic acid
87	M343T733	(M+H)+	Isomaltose
88	M503T850	(M-H)-	Maltotriose
89	M503T872	(M-H)-	Raffinose
90	M667T936	(M+H)+	Stachyose
91	M341T753	(M-H)-	Sucrose
92	M193T712	(M-H)-	2-Keto-D-gluconic acid
93	M401T753_2	(M+CH3COO)-	Galactinol
94	M138T535	(M+H)+	Anthranilic acid (Vitamin L1)
95	M170T182_2	(M+H)+	Pyridoxine
96	M325T78	(M+K)+	Retinol (Vitamin A)
97	M377T388	(M+H)+	Riboflavin
98	M351T886	(2M-H)-	L-Ascorbic acid
99	M182T78	(M-H)-	4-Pyridoxic acid
100	M151T109	(M+CH3COO+2H)+	2-Ethoxyethanol
101	M177T65	(M+H-H2O)+	3-Hydroxy-4-methoxycinnamic acid
102	M415T318	(M+H)+	Ascorbic acid 6-palmitate
103	M338T54	(M+H)+	Erucamide
104	M195T281	(M-H)-	Homoveratric acid
105	M181T351	(M-H)-	Hydroxyphenyllactic acid
106	M169T60	(M+H)+	Jasmine lactone
107	M162T661	(M+H)+	L-Carnitine
108	M493T361	M+	Malvidin 3-O-glucoside cation
109	M145T569	(M+H)+	N-Acetylcadaverine
110	M137T72_2	(M-H)-	Salicylic acid
111	M194T286	(M-H)-	Salicyluric acid
112	M147T65_1	(M+H-H2O)+	trans-3-Coumaric acid
113	M167T323	(M-H)-	Vanillic acid
114	M165T142	(M-H2O-H)-	Vanylglycol

## Sheet: S3
Table S3 The pathways of significant different metabolites between groups
Groups	Pathway_Hierarchy1	Pathway_Hierarchy2	Map_ID	Map.Name	Test	TestAll	Ref	RefAll	Test_per	Ref_per	Over_Under	P value	FDR	richFactor
Leaf vs Culm	Environmental Information Processing	Membrane transport	map02010	ABC transporters	12	51	138	3387	23.5294	4.0744	over	5.2687e-07	5.42676e-05	0.0869565
Leaf vs Culm	Metabolism	Carbohydrate metabolism	map00052	Galactose metabolism	6	51	46	3387	11.7647	1.35813	over	5.10627e-05	0.00198678	0.130435
Leaf vs Culm	Organismal Systems	Digestive system	map04974	Protein digestion and absorption	6	51	47	3387	11.7647	1.38766	over	5.78674e-05	0.00198678	0.12766
Leaf vs Culm	Human Diseases	Cancer: overview	map05230	Central carbon metabolism in cancer	5	51	37	3387	9.80392	1.09241	over	0.000192069	0.00494577	0.135135
Leaf vs Culm	Human Diseases	Substance dependence	map05034	Alcoholism	3	51	10	3387	5.88235	0.295247	over	0.000358418	0.00738341	0.3
Leaf vs Culm	Metabolism	Lipid metabolism	map01040	Biosynthesis of unsaturated fatty acids	6	51	74	3387	11.7647	2.18482	over	0.000732428	0.0125733	0.0810811
Leaf vs Culm	Genetic Information Processing	Translation	map00970	Aminoacyl-tRNA biosynthesis	5	51	52	3387	9.80392	1.53528	over	0.000965812	0.0142112	0.0961538
Leaf vs Culm	Organismal Systems	Nervous system	map04723	Retrograde endocannabinoid signaling	3	51	19	3387	5.88235	0.560968	over	0.00263001	0.0338613	0.157895
Leaf vs Culm	Human Diseases	Substance dependence	map05033	Nicotine addiction	2	51	7	3387	3.92157	0.206673	over	0.00444879	0.050914	0.285714
Leaf vs Culm	Environmental Information Processing	Signal transduction	map04024	cAMP signaling pathway	3	51	25	3387	5.88235	0.738116	over	0.00585804	0.0550092	0.12
Leaf vs Culm	Human Diseases	Substance dependence	map05030	Cocaine addiction	2	51	8	3387	3.92157	0.236197	over	0.00587477	0.0550092	0.25
Leaf vs Culm	Environmental Information Processing	Signaling molecules and interaction	map04080	Neuroactive ligand-receptor interaction	4	51	52	3387	7.84314	1.53528	over	0.00725087	0.0550375	0.0769231
Leaf vs Culm	Organismal Systems	Nervous system	map04730	Long-term depression	2	51	9	3387	3.92157	0.265722	over	0.00748082	0.0550375	0.222222
Leaf vs Culm	Organismal Systems	Nervous system	map04727	GABAergic synapse	2	51	9	3387	3.92157	0.265722	over	0.00748082	0.0550375	0.222222
Leaf vs Culm	Metabolism	Lipid metabolism	map00591	Linoleic acid metabolism	3	51	28	3387	5.88235	0.82669	over	0.00808346	0.0555064	0.107143
Leaf vs Culm	Organismal Systems	Digestive system	map04978	Mineral absorption	3	51	29	3387	5.88235	0.856215	over	0.00892147	0.0561133	0.103448
Leaf vs Culm	Human Diseases	Substance dependence	map05031	Amphetamine addiction	2	51	10	3387	3.92157	0.295247	over	0.00926142	0.0561133	0.2
Leaf vs Culm	Human Diseases	Cancer: overview	map05231	Choline metabolism in cancer	2	51	11	3387	3.92157	0.324771	over	0.0112112	0.0641528	0.181818
Leaf vs Culm	Organismal Systems	Sensory system	map04742	Taste transduction	3	51	33	3387	5.88235	0.974314	over	0.0127711	0.0653547	0.0909091
Leaf vs Culm	Organismal Systems	Nervous system	map04721	Synaptic vesicle cycle	2	51	12	3387	3.92157	0.354296	over	0.0133247	0.0653547	0.166667
Leaf vs Culm	Human Diseases	Substance dependence	map05032	Morphine addiction	2	51	12	3387	3.92157	0.354296	over	0.0133247	0.0653547	0.166667
Leaf vs Culm	Metabolism	Amino acid metabolism	map00400	Phenylalanine, tyrosine and tryptophan biosynthesis	3	51	35	3387	5.88235	1.03336	over	0.015001	0.0702319	0.0857143
Leaf vs Culm	Organismal Systems	Endocrine system	map04923	Regulation of lipolysis in adipocytes	2	51	14	3387	3.92157	0.413345	over	0.0180229	0.080711	0.142857
Leaf vs Culm	Human Diseases	Neurodegenerative disease	map05012	Parkinson disease	2	51	15	3387	3.92157	0.44287	over	0.0205974	0.088397	0.133333
Leaf vs Culm	Organismal Systems	Circulatory system	map04270	Vascular smooth muscle contraction	2	51	16	3387	3.92157	0.472394	over	0.0233157	0.0960606	0.125
Leaf vs Culm	Metabolism	Carbohydrate metabolism	map00650	Butanoate metabolism	3	51	42	3387	5.88235	1.24004	over	0.0244476	0.0968502	0.0714286
Leaf vs Culm	Organismal Systems	Excretory system	map04964	Proximal tubule bicarbonate reclamation	2	51	17	3387	3.92157	0.501919	over	0.0261731	0.0998454	0.117647
Leaf vs Culm	Metabolism	Metabolism of other amino acids	map00430	Taurine and hypotaurine metabolism	2	51	22	3387	3.92157	0.649542	over	0.0423877	0.155926	0.0909091
Leaf vs Culm	Human Diseases	Neurodegenerative disease	map05016	Huntington disease	1	51	3	3387	1.96078	0.088574	over	0.0445089	0.158083	0.333333
Leaf vs Culm	Metabolism	Carbohydrate metabolism	map00051	Fructose and mannose metabolism	3	51	54	3387	5.88235	1.59433	over	0.046603	0.160004	0.0555556
Shoot vs Culm	Environmental Information Processing	Membrane transport	map02010	ABC transporters	16	74	138	3387	21.6216	4.0744	over	2.16208e-08	2.39991e-06	0.115942
Shoot vs Culm	Human Diseases	Cancer: overview	map05230	Central carbon metabolism in cancer	7	74	37	3387	9.45946	1.09241	over	1.08734e-05	0.000603476	0.189189
Shoot vs Culm	Organismal Systems	Nervous system	map04727	GABAergic synapse	4	74	9	3387	5.40541	0.265722	over	2.43676e-05	0.0009016	0.444444
Shoot vs Culm	Organismal Systems	Digestive system	map04974	Protein digestion and absorption	7	74	47	3387	9.45946	1.38766	over	5.5773e-05	0.0015477	0.148936
Shoot vs Culm	Metabolism	Amino acid metabolism	map00250	Alanine, aspartate and glutamate metabolism	5	74	28	3387	6.75676	0.82669	over	0.000288481	0.00640429	0.178571
Shoot vs Culm	Metabolism	Carbohydrate metabolism	map00052	Galactose metabolism	6	74	46	3387	8.10811	1.35813	over	0.000415328	0.00768357	0.130435
Shoot vs Culm	Genetic Information Processing	Translation	map00970	Aminoacyl-tRNA biosynthesis	6	74	52	3387	8.10811	1.53528	over	0.000813781	0.0129042	0.115385
Shoot vs Culm	Metabolism	Lipid metabolism	map01040	Biosynthesis of unsaturated fatty acids	7	74	74	3387	9.45946	2.18482	over	0.000996283	0.0132737	0.0945946
Shoot vs Culm	Human Diseases	Substance dependence	map05034	Alcoholism	3	74	10	3387	4.05405	0.295247	over	0.00107625	0.0132737	0.3
Shoot vs Culm	Metabolism	Amino acid metabolism	map00220	Arginine biosynthesis	4	74	23	3387	5.40541	0.679067	over	0.00135738	0.0150669	0.173913
Shoot vs Culm	Metabolism	Nucleotide metabolism	map00230	Purine metabolism	7	74	95	3387	9.45946	2.80484	over	0.00424441	0.0428299	0.0736842
Shoot vs Culm	Environmental Information Processing	Signaling molecules and interaction	map04080	Neuroactive ligand-receptor interaction	5	74	52	3387	6.75676	1.53528	over	0.00507545	0.0466461	0.0961538
Shoot vs Culm	Organismal Systems	Excretory system	map04964	Proximal tubule bicarbonate reclamation	3	74	17	3387	4.05405	0.501919	over	0.00546306	0.0466461	0.176471
Shoot vs Culm	Metabolism	Amino acid metabolism	map00400	Phenylalanine, tyrosine and tryptophan biosynthesis	4	74	35	3387	5.40541	1.03336	over	0.00658551	0.0522137	0.114286
Shoot vs Culm	Organismal Systems	Nervous system	map04723	Retrograde endocannabinoid signaling	3	74	19	3387	4.05405	0.560968	over	0.00754481	0.0558316	0.157895
Shoot vs Culm	Metabolism	Metabolism of other amino acids	map00480	Glutathione metabolism	4	74	38	3387	5.40541	1.12194	over	0.00883779	0.0601496	0.105263
Shoot vs Culm	Human Diseases	Substance dependence	map05033	Nicotine addiction	2	74	7	3387	2.7027	0.206673	over	0.00921209	0.0601496	0.285714
Shoot vs Culm	Human Diseases	Substance dependence	map05030	Cocaine addiction	2	74	8	3387	2.7027	0.236197	over	0.01211	0.0707479	0.25
Shoot vs Culm	Organismal Systems	Nervous system	map04724	Glutamatergic synapse	2	74	8	3387	2.7027	0.236197	over	0.01211	0.0707479	0.25
Shoot vs Culm	Metabolism	Nucleotide metabolism	map00240	Pyrimidine metabolism	5	74	65	3387	6.75676	1.9191	over	0.0129542	0.0718956	0.0769231
Shoot vs Culm	Organismal Systems	Nervous system	map04730	Long-term depression	2	74	9	3387	2.7027	0.265722	over	0.0153513	0.0811428	0.222222
Shoot vs Culm	Environmental Information Processing	Signal transduction	map04024	cAMP signaling pathway	3	74	25	3387	4.05405	0.738116	over	0.0163078	0.0822804	0.12
Shoot vs Culm	Human Diseases	Substance dependence	map05031	Amphetamine addiction	2	74	10	3387	2.7027	0.295247	over	0.0189201	0.0913101	0.2
Shoot vs Culm	Metabolism	Lipid metabolism	map00591	Linoleic acid metabolism	3	74	28	3387	4.05405	0.82669	over	0.0221703	0.101236	0.107143
Shoot vs Culm	Human Diseases	Cancer: overview	map05231	Choline metabolism in cancer	2	74	11	3387	2.7027	0.324771	over	0.0228009	0.101236	0.181818
Shoot vs Culm	Organismal Systems	Digestive system	map04978	Mineral absorption	3	74	29	3387	4.05405	0.856215	over	0.0243479	0.103263	0.103448
Shoot vs Culm	Metabolism	Amino acid metabolism	map00350	Tyrosine metabolism	5	74	78	3387	6.75676	2.30292	over	0.0266196	0.103263	0.0641026
Shoot vs Culm	Human Diseases	Substance dependence	map05032	Morphine addiction	2	74	12	3387	2.7027	0.354296	over	0.0269787	0.103263	0.166667
Shoot vs Culm	Organismal Systems	Nervous system	map04721	Synaptic vesicle cycle	2	74	12	3387	2.7027	0.354296	over	0.0269787	0.103263	0.166667
Shoot vs Culm	Metabolism	Metabolism of cofactors and vitamins	map00760	Nicotinate and nicotinamide metabolism	4	74	55	3387	5.40541	1.62386	over	0.0309414	0.109443	0.0727273
Shoot vs Culm	Metabolism	Metabolism of other amino acids	map00471	D-Glutamine and D-glutamate metabolism	2	74	13	3387	2.7027	0.38382	over	0.031439	0.109443	0.153846
Shoot vs Culm	Metabolism	Metabolism of other amino acids	map00410	beta-Alanine metabolism	3	74	32	3387	4.05405	0.944789	over	0.031551	0.109443	0.09375
Shoot vs Culm	Organismal Systems	Sensory system	map04742	Taste transduction	3	74	33	3387	4.05405	0.974314	over	0.0341743	0.11495	0.0909091
Shoot vs Culm	Organismal Systems	Endocrine system	map04923	Regulation of lipolysis in adipocytes	2	74	14	3387	2.7027	0.413345	over	0.036168	0.116275	0.142857
Shoot vs Culm	Metabolism	Lipid metabolism	map00061	Fatty acid biosynthesis	4	74	58	3387	5.40541	1.71243	over	0.0366633	0.116275	0.0689655
Shoot vs Culm	Metabolism	Amino acid metabolism	map00360	Phenylalanine metabolism	4	74	60	3387	5.40541	1.77148	over	0.0407965	0.123456	0.0666667
Shoot vs Culm	Human Diseases	Neurodegenerative disease	map05012	Parkinson disease	2	74	15	3387	2.7027	0.44287	over	0.041152	0.123456	0.133333
Shoot vs Culm	Organismal Systems	Circulatory system	map04270	Vascular smooth muscle contraction	2	74	16	3387	2.7027	0.472394	over	0.046378	0.131999	0.125
Shoot vs Culm	Metabolism	Energy metabolism	map00190	Oxidative phosphorylation	2	74	16	3387	2.7027	0.472394	over	0.046378	0.131999	0.125
Shoot vs Leaf	Metabolism	Lipid metabolism	map01040	Biosynthesis of unsaturated fatty acids	6	47	74	3387	12.766	2.18482	over	0.000467946	0.0238652	0.0810811
Shoot vs Leaf	Metabolism	Carbohydrate metabolism	map00052	Galactose metabolism	4	47	46	3387	8.51064	1.35813	over	0.00346781	0.0884291	0.0869565
Shoot vs Leaf	Metabolism	Lipid metabolism	map00591	Linoleic acid metabolism	3	47	28	3387	6.38298	0.82669	over	0.00643449	0.101921	0.107143
Shoot vs Leaf	Environmental Information Processing	Membrane transport	map02010	ABC transporters	6	47	138	3387	12.766	4.0744	over	0.0111163	0.101921	0.0434783
Shoot vs Leaf	Metabolism	Nucleotide metabolism	map00240	Pyrimidine metabolism	4	47	65	3387	8.51064	1.9191	over	0.011874	0.101921	0.0615385
Shoot vs Leaf	Metabolism	Amino acid metabolism	map00400	Phenylalanine, tyrosine and tryptophan biosynthesis	3	47	35	3387	6.38298	1.03336	over	0.0120134	0.101921	0.0857143
Shoot vs Leaf	Metabolism	Carbohydrate metabolism	map00500	Starch and sucrose metabolism	3	47	37	3387	6.38298	1.09241	over	0.0139891	0.101921	0.0810811
Shoot vs Leaf	Metabolism	Lipid metabolism	map00061	Fatty acid biosynthesis	3	47	58	3387	6.38298	1.71243	over	0.0454133	0.289107	0.0517241

## Sheet: S4
Table S4 The fold change in energy-targeted metabolite abundance among the culm, leaf and shoot groups.
Energy metabolites	Fold change
	Shoot-Leaf	Shoot-Culm	Leaf-Culm
lactate	0.581186	2.07646	3.5728
aconitate	0.210964	-	2.80287
FMN	0.439411	0.167425	0.381021
pyruvate	0.269063	-	4.91077
oxaloacetate	4.67147	-	0.166512
malate	0.542267	-	-
cyclic-AMP	0.397425	0.420133	-
AMP	-	0.364635	-
NAD+	-	0.293252	-
note: The numbers mean the fold change of the former group to the latter group (P < 0.05). If the number <1, it means that the amount of the metabolite in the former group is lower than in the latter group; and if the number >1, it means that the amount of metabolite in the former group is higher than in the latter group.

## Sheet: S5
Table S5 The fold change in amino acid abundance among the culm, leaf and shoot groups
Amino acid metabolites	Fold change
	Shoot-Leaf	Shoot-Culm	Leaf-Culm
leucine		2.953	3.44865
alanine/sarcosine		2.45581	2.76535
valine		4.44439	4.28402
glutamate		7.25395	6.93736
Isoleucine		3.89106	3.9268
glycine		3.90068	2.65631
phenylalanine		2.6613	3.28268
tyrosine		2.66937	3.25954
glutamine		3.90495	4.44825
lysine		2.96315	2.81109
proline		3.8901	2.8364
histidine	2.49091	7.20453	2.89233
serine		3.1624	2.90051
aspartate	4.55689	4.45131	3.79133
citrulline		26.2614	13.6214
threonine		3.16635	2.2133
tryptophan			2.10339
ornithine		6.13365	2.74337
arginine	0.496216		2.0694
methionine		4.59902	2.90867
Cystine			2.80496
hydroxyproline	2.772	4.13385
asparagine		2.32187
note: The numbers mean the fold change of the former group to the latter group (P < 0.05). If the number <1, it means that the amount of the metabolite in the former group is lower than in the latter group; and if the number >1, it means that the amount of metabolite in the former group is higher than in the latter group.

## Sheet: S6
Table S6 Content and significance of short-chain fatty acids (SCFA) in fecal samples between bamboo leaf, culm and shoot groups
Short chain fatty acids	Content (μg/g)
	SHOOT	LEAF	CULM
acetic acid	318.21±95.15 b	730.02±270.69 a	839.11±195.25 a
propionic acid	15.21±5.97 a	22.93±12.1 a	2.26±3.43 b
isobutyric acid	2±0.58 b	11.32±12.67 a	2.38±1.07 b
butyric acid	4.35±6.48 b	48.67±30.84 a	18.76±32.84 b
isovaleric acid	0.82±0.37 b	19.2±22.51 a	0.61±0.65 b
valeric acid	0.2±0.08 b	0.65±0.2 a	0.25±0.07 b
caproic acid	1.89±1.11 a	1.8±0.49 a	0.92±0.72 b
total	342.68±97.95 b	834.57±310 a	863.54±181.53 a
note: Data represent the means ± SD. Different superscripts indicate significant difference (p <0.05).

## Sheet: S7
	Table S7 Correlation statistics between 114 untargeted fecal metabolites and 155 gut microbes in giant pandas
Microbes/Metabolites	Acidibacter	Acidibacter	Acidiphilium	Acidiphilium	Acidovorax	Acidovorax	Acinetobacter	Acinetobacter	Actinomyces	Actinomyces	Actinomycetospora	Actinomycetospora	Adlercreutzia	Adlercreutzia	Aeromonas	Aeromonas	Akkermansia	Akkermansia	Alistipes	Alistipes	Allobaculum	Allobaculum	Anaeroglobus	Anaeroglobus	Anaerosporobacter	Anaerosporobacter	Anaerostipes	Anaerostipes	Anaerotruncus	Anaerotruncus	Arthrobacter	Arthrobacter	Azospirillum	Azospirillum	Bacillus	Bacillus	Bacteroides	Bacteroides	Barnesiella	Barnesiella	Bifidobacterium	Bifidobacterium	Bilophila	Bilophila	Blautia	Blautia	Brachymonas	Brachymonas	Bradyrhizobium
Spearman correlation statistic value	r value	p value	r value	p value	r value	p value	r value	p value	r value	p value	r value	p value	r value	p value	r value	p value	r value	p value	r value	p value	r value	p value	r value	p value	r value	p value	r value	p value	r value	p value	r value	p value	r value	p value	r value	p value	r value	p value	r value	p value	r value	p value	r value	p value	r value	p value	r value	p value	r value
Myristic acid	-0.25179	0.205169	0.302148	0.125579	-0.0513409	0.799249	0.379992	0.0505699	0.0262897	0.896437	-0.360899	0.0643944	-0.0535416	0.790828	0.703511	4.24706e-05	0.0399199	0.843285	0.166173	0.407453	-0.1226	0.542385	-0.127098	0.527557	0.451229	0.0181557	0.188003	0.347691	-0.304031	0.123123	0.371657	0.0562854	0.0405541	0.840827	0.488237	0.0097727	0.146149	0.466982	0.107264	0.594361	-0.336914	0.0857113	0.250657	0.207284	-0.0557773	0.782296	-0.17121	0.39318	0.0529115
4-Hydroxycinnamic acid	-0.125895	0.531504	-0.25179	0.205169	0.224315	0.260662	-0.179594	0.370062	0.298181	0.130869	0.256266	0.19696	0.147239	0.463629	-0.386565	0.0463928	-0.106998	0.59528	-0.604355	0.00084189	-0.0391781	0.846163	-0.290509	0.141556	-0.425584	0.0268837	-0.236682	0.234587	0.0285554	0.887565	0.0417369	0.836245	0.120673	0.548797	-0.156737	0.434958	-0.129876	0.518495	-0.436718	0.0227502	-0.330268	0.0924705	-0.0671789	0.739187	0.0536321	0.790482	0.416035	0.0308951	-0.12682
Galactinol	0.302148	0.125579	0.151074	0.451936	-0.00826967	0.967346	0.0174392	0.9312	-0.212048	0.288314	-0.103514	0.607388	-0.0267708	0.894552	0.131603	0.512901	0.0592254	0.769186	0.138477	0.490929	0.235068	0.237888	-0.0363137	0.857293	0.218593	0.273338	0.0777751	0.699798	-0.0205767	0.918859	-0.275265	0.164634	-0.207716	0.298504	-0.124351	0.53659	0.115446	0.566367	0.380021	0.0505505	0.270461	0.172427	0.046953	0.816104	-0.194301	0.331477	-0.219165	0.272052	0.0831466
Sucrose	0.276969	0.16193	0.151074	0.451936	-0.0475506	0.813804	0.0110143	0.956517	-0.214469	0.282714	-0.134847	0.502472	-0.0401562	0.842369	0.115115	0.567488	0.0703506	0.727324	0.151336	0.451143	0.175964	0.379972	-0.0181568	0.928376	0.198748	0.320311	0.0324529	0.872335	-0.043673	0.828757	-0.292489	0.138739	-0.190901	0.340173	-0.132295	0.510669	0.0835139	0.67877	0.419862	0.029233	0.266806	0.178528	0.0527318	0.793924	-0.209625	0.293986	-0.266279	0.17942	0.0797872
Palmitic acid	-0.176253	0.379177	0.327327	0.0955874	-0.0671911	0.739141	0.371119	0.0566708	-0.00276734	0.98907	-0.294874	0.135401	0.0401562	0.842369	0.614351	0.000651705	0.157062	0.433995	0.21464	0.282321	-0.232029	0.244187	0	1	0.455808	0.0168752	0.213742	0.284389	-0.150336	0.454175	0.421344	0.0286094	0.0751734	0.709404	0.459517	0.0158934	0.0859701	0.66984	0.0965377	0.631932	-0.259829	0.190589	0.370568	0.0570682	-0.0940859	0.640651	-0.1527	0.447024	0.0172172
Vanillic acid	-0.125895	0.531504	-0.100716	0.617183	-0.00379027	0.98503	-0.182653	0.361828	0.234878	0.238279	0.291517	0.140118	-0.0535416	0.790828	-0.572214	0.00181639	-0.248027	0.212249	-0.471812	0.0129697	0.0864619	0.668058	-0.181568	0.364735	-0.428637	0.0256942	-0.249552	0.209361	0.0520716	0.79645	-0.216303	0.278519	0.125619	0.532412	-0.356248	0.0681679	-0.154439	0.441805	-0.179284	0.370901	0.142873	0.477134	-0.359732	0.0653253	0.00735525	0.970955	0.367659	0.0592003	0.043673
Phenol	-0.100716	0.617183	-0.125895	0.531504	0.0758053	0.707066	-0.118709	0.555368	0.222425	0.264805	0.369851	0.0575876	0.0267708	0.894552	-0.561527	0.00230621	-0.20778	0.298353	-0.482693	0.0107686	0.0743032	0.712626	-0.145255	0.469742	-0.351702	0.0720193	-0.296553	0.133087	0.12178	0.545109	-0.0828113	0.681333	0.160238	0.424637	-0.175374	0.381595	-0.247471	0.213308	-0.252837	0.203229	0.000996786	0.996063	-0.310612	0.114816	-0.121975	0.544463	0.401312	0.0380114	-0.0176372
L-Ascorbic acid	0.025179	0.900791	0.302148	0.125579	0.0754608	0.708341	0.282393	0.153533	-0.265319	0.181053	-0.210944	0.290889	0.0401562	0.842369	0.783817	1.32422e-06	0.176695	0.377964	0.184966	0.355675	-0.0621445	0.758135	0.0181568	0.928376	0.638376	0.000339573	0.293195	0.137745	-0.293953	0.136684	0.522042	0.00522104	0	1	0.627865	0.000454641	0.140623	0.484171	0.0643585	0.749785	-0.256838	0.195927	0.102574	0.61067	-0.19093	0.340098	-0.39374	0.0421494	0.135218
Salicylic acid	0.302148	0.125579	-0.276969	0.16193	0.114742	0.568752	-0.267402	0.177524	0.215161	0.281127	0.135967	0.498899	-0.0133854	0.947168	-0.781679	1.47883e-06	-0.132848	0.508886	-0.311574	0.113638	0.233042	0.242075	0	1	-0.467715	0.0138898	-0.225492	0.258102	0.0789473	0.695485	-0.533636	0.00414886	0.201781	0.312829	-0.585396	0.00133784	-0.108691	0.589436	-0.0375424	0.852515	0.424631	0.0272641	-0.118466	0.556184	0.0245175	0.903385	0.239357	0.229186	-0.074748
4-Hydroxybenzoate	-0.100716	0.617183	-0.125895	0.531504	0.0758053	0.707066	-0.148998	0.458245	0.196135	0.326844	0.369851	0.0575876	0.0267708	0.894552	-0.56458	0.00215589	-0.200908	0.314971	-0.454997	0.0170965	0.0915281	0.649797	-0.163411	0.4154	-0.330026	0.0927244	-0.280326	0.156695	0.119681	0.552113	-0.0798301	0.692242	0.145401	0.469289	-0.186679	0.351158	-0.227821	0.253086	-0.298807	0.130023	0.00830655	0.9672	-0.320003	0.103691	-0.130249	0.517284	0.390795	0.043852	-0.00545912
Homoveratric acid	-0.025179	0.900791	-0.100716	0.617183	0.113708	0.572262	-0.180817	0.366755	0.131449	0.5134	0.338517	0.0841375	0.120469	0.54948	-0.536794	0.0038916	-0.160661	0.423399	-0.358063	0.0666757	0.0631577	0.75431	-0.0363137	0.857293	-0.286979	0.14668	-0.173455	0.386909	0.183091	0.360659	-0.0142435	0.943785	0.0840755	0.676725	-0.108158	0.591274	-0.262823	0.185346	-0.39841	0.0395573	0.00132905	0.994751	-0.34673	0.0764207	-0.0419862	0.83528	0.267121	0.177997	0.0222564
Kaempferol	-0.201432	0.313685	-0.25179	0.205169	0.221214	0.267483	-0.103412	0.607744	0.175034	0.382533	0.280886	0.155835	0.0401562	0.842369	-0.375573	0.0535406	-0.251626	0.205474	-0.422356	0.0281896	0.109091	0.58806	-0.0726273	0.718846	-0.351091	0.0725491	-0.207587	0.298812	0.156635	0.435261	0	1	0.0761626	0.705746	-0.20165	0.313151	-0.0325458	0.871973	-0.458171	0.0162442	-0.0767525	0.703568	-0.303389	0.123956	-0.0649714	0.747478	0.408463	0.0344073	0.000419933
2-Keto-D-gluconic acid	-0.025179	0.900791	-0.050358	0.803017	0.101303	0.615121	-0.240784	0.226338	0.148745	0.45902	0.244516	0.219002	0.0535416	0.790828	-0.521527	0.00527371	-0.142665	0.477783	-0.337291	0.0853387	0.0371516	0.854034	-0.108941	0.588575	-0.29858	0.130329	-0.229968	0.248519	0.107503	0.593536	0.016231	0.935956	0.0583583	0.772477	-0.165292	0.409979	-0.381953	0.0492938	-0.305703	0.120972	-0.0103001	0.959334	-0.387182	0.0460152	-0.125346	0.53331	0.269644	0.173777	-0.0281355
Maltotriose	0.075537	0.708059	0.176253	0.379177	-0.182277	0.362833	0.33104	0.091666	-0.185412	0.354496	-0.298231	0.130801	-0.120469	0.54948	0.52916	0.00453814	0.141028	0.482898	0.409497	0.0339095	0.0506613	0.801854	0.108941	0.588575	0.487254	0.0099435	0.19136	0.33899	-0.235162	0.237695	0.08248	0.682542	0.0484671	0.810279	0.318362	0.105574	0.246857	0.214483	0.43825	0.0222243	0.159818	0.425869	0.258603	0.192765	-0.0956183	0.635196	-0.3685	0.0585773	0.0445128
Vanylglycol	-0.075537	0.708059	-0.125895	0.531504	-0.137139	0.49517	-0.29249	0.138739	0.166386	0.406842	0.139883	0.486495	-0.0803123	0.690473	-0.690382	6.73651e-05	-0.111907	0.578403	-0.29377	0.13694	0.0496481	0.805742	0.0363137	0.857293	-0.485727	0.0102135	-0.14436	0.472513	0.110022	0.584857	-0.392857	0.0426544	0.080119	0.691182	-0.494959	0.00866973	-0.199267	0.319025	-0.0835128	0.678774	0.33492	0.0876985	-0.369123	0.0581195	0.122588	0.542427	0.13966	0.487198	-0.0214166
Shikimate	0.050358	0.803017	0.327327	0.0955874	-0.166772	0.405741	0.309317	0.116418	-0.346264	0.0768438	-0.237242	0.23345	-0.0401562	0.842369	0.621374	0.000541593	0.064788	0.748168	0.213651	0.284598	-0.0364761	0.856661	-0.0363137	0.857293	0.400244	0.0385743	0.104073	0.605437	-0.416993	0.0304721	0.144423	0.472317	0.0454997	0.821705	0.297281	0.132091	0.334977	0.0876416	0.220658	0.268718	-0.161147	0.42198	0.124967	0.534557	-0.0772302	0.701806	-0.344943	0.0780518	0.0726483
Quinate	0.050358	0.803017	0.327327	0.0955874	-0.194337	0.331386	0.26832	0.175984	-0.410258	0.0335469	-0.151633	0.450243	-0.120469	0.54948	0.62229	0.000528503	0.0307579	0.878953	0.185955	0.353062	-0.0435687	0.82916	-0.0363137	0.857293	0.307739	0.11839	0.147717	0.462165	-0.385918	0.0467914	0.126536	0.5294	0.00890212	0.96485	0.278644	0.159303	0.290149	0.142073	0.253603	0.201816	-0.153837	0.443608	0.0426189	0.832832	-0.098683	0.624342	-0.328958	0.0938495	0.159994
Salicyluric acid	-0.125895	0.531504	-0.201432	0.313685	0.257394	0.194928	-0.0501761	0.803715	0.358717	0.0661443	0.390554	0.0439938	-0.0936977	0.642036	-0.572824	0.00179134	-0.0667513	0.740791	-0.39466	0.0416279	0.177652	0.375343	-0.236039	0.2359	-0.364219	0.0618007	-0.134288	0.504263	0.0554311	0.783616	-0.190135	0.342151	0.113749	0.572122	-0.272227	0.169532	0.0568017	0.778395	-0.197672	0.322991	0.19836	0.321276	-0.131468	0.513336	-0.0165493	0.934703	0.301615	0.12628	0.00503919
Thymidine	-0.25179	0.205169	-0.125895	0.531504	0.223281	0.262923	0.203152	0.309484	0.206167	0.302203	0.195277	0.329007	0.0803123	0.690473	-0.211298	0.290062	-0.302671	0.124893	-0.461921	0.0152827	-0.0878129	0.66317	-0.108941	0.588575	-0.252786	0.203323	-0.225492	0.258102	-0.00377939	0.985073	0.198085	0.321962	0.312563	0.112436	-0.169875	0.396934	0.00214925	0.991511	-0.213762	0.284341	-0.0312326	0.877099	-0.169031	0.399319	-0.253143	0.202663	0.553171	0.00276442	0.0419933
Taurochenodeoxycholate	-0.276969	0.16193	0.125895	0.531504	0.0737379	0.714722	0.414258	0.031692	-0.102738	0.610099	-0.322291	0.101106	0.0267708	0.894552	0.834199	6.43441e-08	-0.0857296	0.670713	0.166173	0.407453	-0.189811	0.342989	0.0907841	0.652466	0.465883	0.0143184	0.20423	0.306869	-0.269597	0.173857	0.576035	0.00166448	-0.0326411	0.871601	0.417049	0.0304476	0.333748	0.0888824	0.0743187	0.712569	-0.309336	0.116394	0.146638	0.465477	-0.0370827	0.854302	-0.0248191	0.902202	-0.0369541
Flavin mononucleotide (FMN)	0.050358	0.803017	-0.125895	0.531504	0.0647791	0.748201	-0.182653	0.361828	0.0899386	0.655505	0.185205	0.355042	0.120469	0.54948	-0.535573	0.00398944	-0.280094	0.157054	-0.313552	0.111242	0.0807203	0.688978	-0.0181568	0.928376	-0.304381	0.12267	-0.32397	0.0992406	0.102044	0.612527	-0.150385	0.454024	0.0860538	0.669537	-0.313474	0.111337	-0.0859701	0.66984	-0.229085	0.25039	0.207664	0.298629	-0.249212	0.210002	-0.0830531	0.68045	0.231364	0.245579	0.0550112
Uridine	-0.176253	0.379177	0.302148	0.125579	-0.298397	0.130576	0.119321	0.553317	-0.367711	0.0591618	0.050358	0.803017	-0.17401	0.385368	0.478168	0.0116428	-0.0124341	0.950918	0.0257172	0.898681	-0.428595	0.0257104	0.0544705	0.78728	0.321172	0.102364	0.111907	0.578403	-0.0974243	0.62879	0.123886	0.538127	-0.0820973	0.68394	0.371219	0.056599	-0.0202644	0.920087	0.240578	0.226747	-0.112969	0.574778	-0.0859601	0.669877	0.0312598	0.876993	-0.154383	0.441973	-0.233063
Linoleic acid	-0.327327	0.0955874	0.100716	0.617183	-0.0854533	0.671716	0.230076	0.248292	0.0249061	0.901861	-0.218218	0.274181	-0.0803123	0.690473	0.549618	0.00298165	0.234611	0.238829	0.270031	0.173138	-0.242836	0.222283	-0.127098	0.527557	0.26744	0.177459	0.0341315	0.865789	-0.0688689	0.732858	0.34052	0.0822035	-0.0405541	0.840827	0.37183	0.0561616	0.0386866	0.848071	0.14021	0.485469	-0.352198	0.0715916	0.327949	0.0949219	-0.0432121	0.830538	-0.111055	0.581316	0.00461926
all cis-(6,9,12)-Linolenic acid	-0.327327	0.0955874	-0.075537	0.708059	0.206397	0.301651	0.177758	0.375055	0.248715	0.210943	-0.115264	0.566982	0.200781	0.315285	0.255878	0.197663	-0.0513723	0.799129	-0.0346193	0.863889	-0.0462706	0.818733	-0.254196	0.200729	0.124561	0.535896	0.0067144	0.973484	-0.00167973	0.993366	0.487593	0.00988435	0.113749	0.572122	0.269478	0.174054	0.0211855	0.916467	-0.324857	0.098265	-0.41134	0.0330369	0.222485	0.264673	-0.0386151	0.848348	0.289836	0.142523	-0.0646696
DL-lactate	0.327327	0.0955874	-0.050358	0.803017	-0.129558	0.519529	-0.314824	0.109722	-0.114499	0.569576	0.093442	0.642948	-0.0267708	0.894552	-0.334046	0.0885807	0.0513723	0.799129	0.0791299	0.694813	0.11517	0.5673	0.236039	0.2359	-0.180736	0.366975	0.0967992	0.631004	0.285974	0.148163	-0.699921	4.82967e-05	-0.0484671	0.810279	-0.416132	0.030852	-0.0187292	0.926124	0.257434	0.194856	0.500386	0.00785709	-0.0924613	0.646454	0.374505	0.0542784	-0.179202	0.371124	-0.0466125
Uracil	-0.25179	0.205169	0.302148	0.125579	-0.267731	0.176971	0.361329	0.0640539	-0.217236	0.276399	-0.149395	0.457035	-0.0803123	0.690473	0.685496	7.95037e-05	0.0821303	0.683819	0.30465	0.122323	-0.156712	0.435032	0.108941	0.588575	0.571516	0.00184539	0.170098	0.396305	-0.272116	0.169713	0.465068	0.0145125	0.12463	0.53567	0.664223	0.000157969	0.212776	0.286621	0.0329454	0.870414	-0.206667	0.301006	0.122078	0.54412	-0.00950054	0.962488	-0.327696	0.0951921	0.18855
4-Pyridoxic acid	-0.075537	0.708059	-0.176253	0.379177	-0.113019	0.574608	-0.264342	0.182725	0.0262897	0.896437	0.122538	0.542592	-0.17401	0.385368	-0.463817	0.0148148	-0.136447	0.497368	-0.138477	0.490929	0.208049	0.297713	-0.0907841	0.652466	-0.333995	0.0886324	-0.161705	0.420353	0.0508118	0.801277	-0.193116	0.334493	0.0445106	0.825522	-0.366025	0.0604245	-0.134789	0.502659	-0.093473	0.642838	0.292723	0.13841	-0.456528	0.0166809	-0.0557773	0.782296	0.184671	0.356457	0.00671892
Allantoin	0.025179	0.900791	0.100716	0.617183	-0.1523	0.448232	0.00520118	0.979459	-0.0221387	0.912722	-0.109668	0.586072	-0.294479	0.135951	0.16855	0.400682	0.205162	0.304618	0.200792	0.315257	0.0124965	0.950672	0.217882	0.274939	-0.257365	0.194979	0.414614	0.0315312	-0.0894456	0.65728	-0.225247	0.258634	-0.000989124	0.996093	-0.188818	0.345567	-0.0558806	0.781902	0.313364	0.111468	0.18806	0.347541	-0.460862	0.0155493	0.40791	0.0346758	-0.255763	0.197872	0.0461926
Vanillin	0.226611	0.255684	0.075537	0.708059	-0.184689	0.356408	-0.260977	0.188567	0	1	0.0811323	0.687469	0.107083	0.594987	-0.211603	0.289349	-0.0867112	0.667155	-0.144412	0.47235	0.0526877	0.794092	-0.145255	0.469742	0.019539	0.922939	-0.196396	0.326188	0.292693	0.138452	-0.612472	0.000684284	-0.232444	0.24332	-0.170486	0.395213	-0.0273262	0.892377	0.288847	0.143953	0.243216	0.22154	0.283885	0.151279	0.0885695	0.660438	-0.12704	0.527746	0.087346
(+)-Abscisic acid	-0.226611	0.255684	0.327327	0.0955874	-0.0613334	0.761201	0.406304	0.0354654	-0.358025	0.0667067	0.136526	0.497117	-0.133854	0.505654	0.642443	0.000302442	-0.0451553	0.823034	0.145401	0.469289	-0.295524	0.134501	0.0544705	0.78728	0.203328	0.309056	0.176812	0.377641	-0.240201	0.227498	0.426644	0.0264658	0.0405541	0.840827	0.457073	0.0165349	0.221066	0.267811	0.0452042	0.822845	-0.359175	0.0657737	-0.205149	0.30465	0.00704878	0.972164	-0.0159852	0.936925	0.0587906
L-Phenylalanine	-0.327327	0.0955874	0.151074	0.451936	-0.111296	0.580491	0.150222	0.45452	-0.0937437	0.641871	0.132609	0.509655	0.0936977	0.642036	0.30229	0.125392	0.138084	0.492175	0.0108804	0.957045	-0.480607	0.0111645	-0.0181568	0.928376	0.320867	0.102709	-0.05987	0.766742	-0.0608902	0.762878	0.509786	0.00660094	0.219586	0.27111	0.510541	0.00650788	-0.109612	0.586267	-0.191543	0.33852	-0.360504	0.0647082	0.0353953	0.860866	-0.186333	0.352068	-0.0681473	0.735558	-0.0218365
L-Leucine	-0.327327	0.0955874	0.176253	0.379177	-0.105438	0.600688	0.251186	0.206294	-0.0961651	0.633254	-0.0016786	0.99337	0.0936977	0.642036	0.451908	0.0179608	0.143646	0.474727	0.0900103	0.655248	-0.456289	0.0167451	0.0544705	0.78728	0.469241	0.0135409	-0.0179051	0.929367	-0.135638	0.499946	0.493224	0.00894391	0.208705	0.296158	0.58784	0.00126229	0.0346951	0.863593	-0.108796	0.589073	-0.33791	0.0847307	0.188534	0.346305	-0.131782	0.512324	-0.191822	0.337804	0.0155375
2-Dehydro-3-deoxy-D-gluconate	0.302148	0.125579	-0.050358	0.803017	-0.136105	0.498458	-0.291572	0.14004	-0.0972029	0.629574	0.041965	0.835362	-0.0267708	0.894552	-0.377099	0.0524993	-0.141683	0.480849	-0.0454997	0.821705	0.173937	0.38557	0.0363137	0.857293	-0.418257	0.0299213	-0.0307743	0.878889	0.0197368	0.922161	-0.67839	0.000100615	-0.031652	0.875462	-0.508708	0.00673584	-0.00583369	0.976961	0.180817	0.366757	0.293055	0.137942	-0.277384	0.161276	0.307695	0.118446	-0.06352	0.752944	-0.049552
L-Glutamate	-0.327327	0.0955874	0.125895	0.531504	-0.127835	0.525144	0.269849	0.173438	-0.0643407	0.749852	0.00559533	0.977903	0.0936977	0.642036	0.417405	0.0302918	0.175386	0.381564	0.0900103	0.655248	-0.377595	0.0521643	0.0726273	0.718846	0.483896	0.0105457	0.0615486	0.760387	-0.176372	0.378851	0.638641	0.00033704	0.26014	0.19004	0.639475	0.000329166	0.0132026	0.947888	-0.182349	0.362641	-0.297374	0.131964	0.107631	0.593093	-0.141282	0.482103	-0.147232	0.463652	-0.037374
Acetyl-DL-Leucine	-0.201432	0.313685	-0.125895	0.531504	-0.00723596	0.971426	0.218755	0.272972	-0.207205	0.299722	0.0912039	0.65096	-0.133854	0.505654	0.419237	0.0294997	0.195673	0.328008	0.177053	0.376982	-0.190486	0.341242	-0.0363137	0.857293	0.0418257	0.835901	0.0699416	0.72885	-0.267497	0.177363	0.57471	0.00171586	0.123641	0.538938	0.309502	0.116188	0.0816716	0.685496	-0.190777	0.340493	-0.391404	0.0434953	-0.203704	0.308143	-0.209012	0.295433	0.0260811	0.897255	0.0235162
Taurocholate	-0.226611	0.255684	0.025179	0.900791	0.23982	0.228258	0.358881	0.0660111	0.115882	0.564889	-0.292636	0.138533	0.160625	0.423506	0.65374	0.000217311	-0.317069	0.107077	-0.0919885	0.648147	-0.164143	0.413287	-0.0907841	0.652466	0.343154	0.0797116	0.0229409	0.909572	-0.330487	0.0922419	0.629034	0.000440342	-0.0415432	0.836995	0.301558	0.126355	0.220145	0.26986	-0.157065	0.433985	-0.474802	0.0123306	0.148805	0.458836	-0.148331	0.460284	0.247349	0.213541	-0.0617301
Alpha-D-Glucose	0.327327	0.0955874	-0.125895	0.531504	0.0678802	0.736558	-0.1799	0.369234	0.126952	0.528035	0.114704	0.568879	-0.0401562	0.842369	-0.631756	0.000408591	0.0667513	0.740791	-0.2819	0.154283	0.174613	0.383699	0.163411	0.4154	-0.39597	0.0408951	-0.0604296	0.764622	0.138998	0.489286	-0.421675	0.0284715	0.262118	0.186572	-0.524901	0.004937	-0.200188	0.316747	0.163195	0.416027	0.487096	0.00997117	-0.221763	0.266267	0.034018	0.866232	0.163638	0.414746	-0.100784
cis-9-Palmitoleic acid	-0.276969	0.16193	0.302148	0.125579	0.197783	0.322715	0.35062	0.0729598	0.168462	0.40093	-0.0525961	0.794443	0.0401562	0.842369	0.447634	0.019216	-0.0376294	0.852177	-0.0623148	0.757492	-0.133408	0.507086	-0.254196	0.200729	0.297664	0.131569	0.008393	0.966859	-0.149496	0.456729	0.434594	0.0234961	0.047478	0.814083	0.459823	0.0158146	-0.0558806	0.781902	-0.0306469	0.879387	-0.457857	0.016327	0.178421	0.373245	-0.182655	0.361821	0.0774018	0.701173	0.0764277
alpha-Linolenic acid	-0.327327	0.0955874	-0.125895	0.531504	0.172285	0.39017	0.0513999	0.799023	0.271891	0.17008	-0.0436436	0.82887	0.187395	0.349279	0.104122	0.605266	-0.0696962	0.729767	-0.109793	0.585645	-0.092879	0.64496	-0.326823	0.0961293	-0.00305297	0.987942	-0.0436436	0.82887	0.0596304	0.76765	0.387888	0.0455859	0.130564	0.516262	0.207455	0.299126	-0.0460554	0.819562	-0.360867	0.0644196	-0.377117	0.0524871	0.228264	0.25214	-0.0110329	0.956443	0.318862	0.104998	-0.0394737
D-Allose	0.276969	0.16193	0.075537	0.708059	0.0130936	0.948317	-0.0455868	0.821369	0.117612	0.559055	0.100716	0.617183	-0.0669269	0.740132	-0.592061	0.00114049	-0.0988181	0.623865	-0.298715	0.130147	0.095581	0.635328	0.272352	0.169329	-0.27782	0.160591	-0.104073	0.605437	0.0802071	0.690859	-0.411406	0.0330058	0.306628	0.119794	-0.471128	0.0131198	-0.258217	0.193452	0.170856	0.394171	0.461179	0.015469	-0.262937	0.185149	-0.0478091	0.812809	0.197711	0.322894	-0.109602
Azelaic acid	-0.302148	0.125579	0.201432	0.313685	-0.0348015	0.863179	0.311459	0.113779	-0.142864	0.477161	0.106871	0.595721	-0.0133854	0.947168	0.388702	0.0450949	-0.103399	0.607788	-0.12463	0.53567	-0.344159	0.0787758	0.108941	0.588575	0.220119	0.269918	-0.0033572	0.986741	-0.18435	0.357307	0.567754	0.00200863	0.0682496	0.735176	0.41216	0.0326544	0.0469765	0.816014	-0.216061	0.279071	-0.473805	0.0125407	-0.0404518	0.841223	-0.145879	0.467814	0.192243	0.336726	-0.0755879
Raffinose	0.25179	0.205169	0.075537	0.708059	-0.0682248	0.735268	-0.0795474	0.69328	-0.268086	0.176374	-0.0195837	0.922763	-0.133854	0.505654	0.0757252	0.707363	0.092601	0.645954	0.221564	0.266707	0.166845	0.405533	0	1	0.137384	0.494393	0.157229	0.4335	0.0218365	0.913909	-0.331908	0.0907669	-0.229477	0.249559	-0.137183	0.49503	0.11606	0.56429	0.376957	0.0525958	0.281094	0.155516	0.0209483	0.917399	-0.0756978	0.707464	-0.214117	0.283523	-0.0167973
Arbutin	0.25179	0.205169	-0.302148	0.125579	0.310113	0.115432	-0.199786	0.317738	0.280539	0.156367	0.184646	0.356523	0.281093	0.155516	-0.72458	1.92069e-05	-0.26177	0.187179	-0.26014	0.19004	0.177652	0.375343	0.0363137	0.857293	-0.433827	0.0237701	-0.146038	0.467324	0.325028	0.0980781	-0.407763	0.0347476	0.21464	0.282321	-0.497098	0.00834147	-0.107156	0.594736	-0.093473	0.642838	0.424631	0.0272641	-0.0462307	0.818887	0.0517932	0.797516	0.328958	0.0938495	-0.0663493
DL-3-Phenyllactic acid	0.151074	0.451936	-0.151074	0.451936	-0.0578877	0.774265	-0.534497	0.00407729	-0.0456611	0.821082	0.0363696	0.857075	0.0936977	0.642036	-0.409771	0.0337787	0.202217	0.311763	0.105836	0.599306	0.214466	0.28272	-0.0363137	0.857293	-0.23172	0.244832	0.123097	0.540737	0.447648	0.0192116	-0.26334	0.184451	0.0623148	0.757492	-0.32264	0.100716	-0.250235	0.208076	0.108796	0.589073	0.35253	0.0713059	-0.00866825	0.965773	0.160896	0.422712	-0.0218744	0.91376	0.0159574
D-Fructose	0.226611	0.255684	-0.276969	0.16193	0.00482398	0.980948	-0.0290654	0.88557	0.231765	0.244739	0.0307743	0.878889	-0.0401562	0.842369	-0.543817	0.00336778	-0.0552989	0.78412	-0.268053	0.176431	0.196228	0.32661	0.199725	0.317889	-0.352923	0.0709687	0.0984778	0.625066	0.0655095	0.745454	-0.367351	0.0594295	0.308607	0.117303	-0.484265	0.0104779	0.0184222	0.927332	-0.026816	0.894375	0.476796	0.0119192	-0.0881272	0.662034	0.243336	0.221304	0.286892	0.146808	-0.225504
L-Citrulline	-0.25179	0.205169	0.176253	0.379177	-0.0596105	0.767725	0.284229	0.150763	-0.125568	0.532578	-0.235004	0.238021	0.0401562	0.842369	0.654046	0.000215339	0.124668	0.535544	0.141445	0.481594	-0.258035	0.193779	0.0181568	0.928376	0.641124	0.000314076	0.137645	0.493564	-0.317049	0.1071	0.653215	0.000220742	0.138477	0.490929	0.644363	0.000286182	0.116981	0.561181	-0.093473	0.642838	-0.259164	0.191766	0.179144	0.371282	-0.259579	0.191031	-0.299511	0.129077	0.108343
Caproic acid	-0.327327	0.0955874	0.276969	0.16193	-0.162292	0.418645	0.312682	0.112291	-0.0999702	0.619805	-0.0867276	0.667095	-0.0803123	0.690473	0.559389	0.00241672	0.00883473	0.965116	0.00692387	0.972658	-0.489726	0.00951885	0.108941	0.588575	0.270798	0.171872	0.0856086	0.671152	-0.18813	0.34736	0.563117	0.00222685	0.120673	0.548797	0.470517	0.013255	-0.0264051	0.895985	0.00153234	0.993948	-0.435263	0.023259	0.117021	0.561044	-0.0450509	0.823436	0.0719332	0.721427	-0.0739081
Gamma-Glutamylcysteine	-0.25179	0.205169	-0.100716	0.617183	-0.0530637	0.792654	-0.116873	0.561543	0.341075	0.0816736	0.0822514	0.683377	-0.107083	0.594987	-0.587786	0.00126391	-0.0235593	0.907145	-0.243325	0.221327	-0.0783561	0.697659	0.108941	0.588575	-0.598687	0.000969823	-0.136526	0.497117	0.231803	0.24466	-0.225909	0.257199	0.280911	0.155795	-0.543233	0.00340892	-0.123122	0.540656	0.00536321	0.978819	0.247867	0.212553	-0.128579	0.522717	0.234449	0.239163	0.4194	0.0294298	-0.0516517
Hydroxyphenyllactic acid	0.327327	0.0955874	-0.151074	0.451936	0.150577	0.453443	-0.352762	0.0711066	0.0134908	0.946752	0.171217	0.393158	0.0669269	0.740132	-0.521527	0.00527371	-0.0670785	0.739563	-0.00593474	0.976562	0.360033	0.0650844	0.0544705	0.78728	-0.285758	0.148483	0.139324	0.488257	0.259098	0.191883	-0.224253	0.260797	0.152325	0.448155	-0.315613	0.108787	-0.241023	0.225862	-0.0168558	0.933496	0.38343	0.0483495	-0.234765	0.238512	0.0619067	0.759034	0.145549	0.468833	0.055851
Hypoxanthine	-0.276969	0.16193	0.226611	0.255684	-0.240165	0.22757	0.34083	0.0819071	-0.0702213	0.727806	-0.0447626	0.824549	-0.0267708	0.894552	0.473893	0.0125221	0.118124	0.557335	0.13551	0.500355	-0.291134	0.140664	0.145255	0.469742	0.47321	0.0126675	0.152193	0.448554	-0.2486	0.21116	0.602535	0.000881268	0.268053	0.176431	0.645891	0.000273801	0.0104392	0.958785	-0.0965377	0.631932	-0.183076	0.360697	0.0151694	0.940138	-0.039841	0.843591	-0.188877	0.345412	0.0760078
Succinate	-0.176253	0.379177	0.176253	0.379177	0.0596105	0.767725	0.129723	0.518991	-0.100316	0.618589	-0.141002	0.48298	0.160625	0.423506	0.407023	0.0351101	0.0598798	0.766705	0.154303	0.442212	-0.210075	0.292926	0.236039	0.2359	0.548619	0.00304535	0.223254	0.262983	0.0130179	0.948616	0.478318	0.0116129	0.110782	0.582251	0.485182	0.0103115	0.118209	0.557048	-0.167792	0.402834	-0.0927011	0.645596	0.287497	0.14592	-0.0113393	0.955235	-0.192663	0.335649	0.0113382
1-Palmitoyl-2-hydroxy-sn-glycero-3-phosphoethanolamine	-0.276969	0.16193	0.327327	0.0955874	0.0575431	0.775575	0.303504	0.123807	0.196135	0.326844	-0.134847	0.502472	0.0267708	0.894552	0.403969	0.0366383	0.190437	0.341369	0.0820973	0.68394	-0.336391	0.0862289	0	1	0.341627	0.0811488	0.106871	0.595721	0.0230963	0.908962	0.300439	0.127838	0.104847	0.602742	0.402383	0.0374529	-0.101322	0.615056	0.14404	0.473503	-0.217299	0.276257	0.338062	0.0845825	-0.0989894	0.62326	-0.142184	0.479283	0.00839865
Chenodeoxycholate	-0.302148	0.125579	0.151074	0.451936	0.0151611	0.94017	0.232829	0.242518	0.0823284	0.683095	-0.392233	0.0430141	-0.0803123	0.690473	0.603664	0.00085665	0.165569	0.409182	0.20376	0.308008	-0.0813958	0.686505	-0.0363137	0.857293	0.372462	0.0557121	0.233325	0.241487	-0.0508118	0.801277	0.666465	0.000147315	-0.0890212	0.658809	0.292392	0.138876	0.00491258	0.980598	0.129483	0.519773	-0.169786	0.397185	0.19648	0.325976	-0.163041	0.416471	0.0689886	0.732411	0.049972
Arachidonic Acid (peroxide free)	-0.327327	0.0955874	0	1	0.0186068	0.926606	0.212024	0.288367	0.160506	0.423854	-0.158907	0.428544	-0.0267708	0.894552	0.367939	0.0589922	0.296781	0.132773	0.347183	0.0760118	-0.198592	0.320699	-0.127098	0.527557	0.300412	0.127874	0.128133	0.524172	0.00419933	0.983415	0.306402	0.120081	0.0890212	0.658809	0.418882	0.0296518	-0.00951812	0.962419	0.104966	0.602331	-0.165134	0.410432	0.29472	0.135614	-0.0315663	0.875796	-0.186774	0.350909	0.049972
Thr-Leu	-0.276969	0.16193	-0.125895	0.531504	0.106472	0.597102	0.0572129	0.77683	0.376358	0.0530025	0.162265	0.418725	0.0803123	0.690473	-0.292519	0.138697	0.00621703	0.975448	-0.410486	0.0334388	-0.2273	0.254202	-0.0181568	0.928376	-0.0891467	0.658357	-0.102395	0.611299	0.012598	0.950272	0.296796	0.132754	0.253216	0.202529	0.0834098	0.67915	-0.213083	0.28591	-0.350907	0.0727098	-0.0747589	0.710938	-0.116299	0.563481	-0.0732461	0.716548	0.253239	0.202487	-0.0646696
Malvidin 3-O-glucoside cation	-0.050358	0.803017	-0.25179	0.205169	0.297364	0.131979	-0.0896438	0.656566	0.296106	0.1337	0.235563	0.236873	0.160625	0.423506	-0.463817	0.0148148	-0.225449	0.258195	-0.411476	0.0329735	0.05235	0.795385	-0.0363137	0.857293	-0.354144	0.06993	-0.20423	0.306869	0.147816	0.46186	0.119579	0.552452	0.0583583	0.772477	-0.232814	0.242549	-0.190977	0.339978	-0.389982	0.0443318	-0.0451876	0.822909	-0.181311	0.365427	-0.156299	0.436258	0.424028	0.0275071	0.00965845
N-.alpha.-Acetyl-L-arginine	-0.226611	0.255684	-0.100716	0.617183	0.0702922	0.727542	-0.16246	0.418157	0.038051	0.850539	0.247873	0.212542	0.0133854	0.947168	-0.331603	0.0910816	-0.0615159	0.760511	-0.209694	0.293822	-0.0226287	0.910798	-0.0726273	0.718846	-0.285758	0.148483	-0.338517	0.0841375	0.153275	0.445295	0.137798	0.493079	-0.0385758	0.848501	-0.214177	0.283386	-0.112375	0.576802	-0.355504	0.0687873	-0.0936978	0.642035	-0.247045	0.214123	-0.179284	0.370901	0.287733	0.145575	0.0575308
Isomaltose	0.125895	0.531504	0.226611	0.255684	-0.175041	0.382514	0.230687	0.247001	-0.283998	0.151109	-0.282564	0.153273	-0.147239	0.463629	0.461374	0.0154199	0.0556261	0.782872	0.500497	0.00784124	0.043231	0.830465	0.363137	0.0626374	0.337964	0.0846784	0.115264	0.566982	-0.049972	0.804498	-0.0841363	0.676504	-0.176064	0.379696	0.123434	0.539621	0.0703113	0.727471	0.55854	0.0024619	0.186399	0.351895	-0.022393	0.911723	-0.0560838	0.781128	-0.392478	0.0428725	0.0352743
Cellobiose	0.302148	0.125579	0.125895	0.531504	-0.113708	0.572262	0.0208047	0.917963	-0.245602	0.216899	-0.134847	0.502472	-0.120469	0.54948	-0.00519084	0.9795	0.0903106	0.654168	0.33828	0.0843687	0.308358	0.117613	0.254196	0.200729	0.0973897	0.628913	0.0358101	0.859252	0.12514	0.533988	-0.378282	0.0517036	-0.212662	0.286887	-0.268256	0.176091	0.0518891	0.797149	0.5164	0.00582243	0.435928	0.0230255	-0.0520095	0.796688	-0.0848919	0.673755	-0.221689	0.26643	0.0453527
3.alpha.-Mannobiose	0.25179	0.205169	0.125895	0.531504	-0.091311	0.650575	0.0816891	0.685432	-0.294376	0.136093	-0.106871	0.595721	-0.133854	0.505654	0.0589313	0.770302	0.0644608	0.7494	0.340259	0.082454	0.30667	0.119741	0.272352	0.169329	0.129751	0.518901	0.050358	0.803017	0.12514	0.533988	-0.354101	0.0699666	-0.233433	0.241263	-0.215093	0.281281	0.145228	0.469824	0.509505	0.00663596	0.42164	0.0284859	-0.0541766	0.788402	-0.0830531	0.68045	-0.203601	0.308393	0.00293953
trans-Vaccenic acid	-0.276969	0.16193	-0.125895	0.531504	0.146442	0.46608	-0.0752641	0.709068	0.190255	0.341841	0.177932	0.374581	-0.147239	0.463629	-0.33771	0.0849271	-0.071005	0.724884	-0.220575	0.268903	-0.0388403	0.847474	0.0181568	0.928376	-0.176462	0.378604	-0.205908	0.302824	0.18687	0.350657	0.0934111	0.643059	0.0247281	0.902559	-0.148793	0.458872	-0.140623	0.484171	-0.266628	0.178829	0.0880494	0.662315	-0.193591	0.333283	-0.237207	0.233522	0.258287	0.193329	0.0529115
Val-Val	-0.302148	0.125579	-0.226611	0.255684	0.101303	0.615121	0	1	0.383969	0.0480088	0.177932	0.374581	0.0669269	0.740132	-0.321832	0.101621	0.0238865	0.905861	-0.541051	0.00356641	-0.200619	0.315684	-0.127098	0.527557	-0.168829	0.399889	-0.1203	0.550044	-0.0676091	0.737574	0.228228	0.252217	0.30465	0.122323	0.0320807	0.873788	-0.0961023	0.633476	-0.450509	0.018364	-0.153173	0.445603	-0.022393	0.911723	-0.0499544	0.804566	0.269224	0.174476	-0.113382
2-Phenylbutyric acid	-0.327327	0.0955874	0.226611	0.255684	-0.294952	0.135294	0.246291	0.21557	-0.159814	0.42588	-0.0995969	0.62112	-0.17401	0.385368	0.536489	0.00391587	0.282384	0.153547	0.482693	0.0107686	-0.161778	0.42014	-0.0181568	0.928376	0.178293	0.373594	0.194718	0.330422	0.049552	0.80611	0.00198747	0.99215	-0.105836	0.599306	0.285671	0.148612	0.237032	0.233877	0.432121	0.0243891	-0.0561523	0.780868	0.160363	0.424273	0.186027	0.352874	-0.352936	0.0709581	0.12346
Leu-Val	-0.276969	0.16193	-0.100716	0.617183	0.148165	0.460792	0.0963747	0.63251	0.408529	0.0343754	0.193598	0.333263	0.0535416	0.790828	-0.295267	0.134856	-0.00327212	0.987077	-0.540062	0.00363983	-0.165831	0.408431	-0.108941	0.588575	-0.17463	0.383651	-0.0699416	0.72885	-0.0902855	0.654258	0.296464	0.133207	0.268053	0.176431	0.0494959	0.806326	-0.174397	0.384297	-0.394579	0.0416741	-0.165134	0.410432	-0.142304	0.478909	-0.0913277	0.650515	0.284788	0.149926	-0.0201568
Ile-Ile	-0.176253	0.379177	-0.25179	0.205169	0.24809	0.212129	0.0299833	0.881981	0.392963	0.0425936	0.256266	0.19696	0.107083	0.594987	-0.461985	0.0152668	-0.0373022	0.853449	-0.467856	0.0138573	-0.0320855	0.873769	0	1	-0.199969	0.317285	-0.134847	0.502472	0.0894456	0.65728	0.140117	0.485761	0.251238	0.206198	-0.0861595	0.669154	-0.103778	0.606465	-0.406837	0.0352014	-0.00498393	0.980317	-0.111965	0.578204	-0.0916342	0.649416	0.376493	0.0529111	-0.12556
3,5-Dimethoxy-4-hydroxycinnamic acid	-0.100716	0.617183	-0.151074	0.451936	0.193648	0.333137	-0.126664	0.528979	0.274659	0.165603	0.233885	0.240328	0.133854	0.505654	-0.471756	0.012982	-0.23592	0.236143	-0.39466	0.0416279	0.108753	0.589223	-0.0726273	0.718846	-0.337658	0.0849777	-0.298231	0.130801	0.180571	0.36742	0.050018	0.804322	0.0326411	0.871601	-0.259701	0.190816	-0.184836	0.35602	-0.375424	0.0536425	-0.069775	0.729472	-0.224652	0.259926	-0.121668	0.545482	0.447585	0.0192308	0.055851
Taurodeoxycholic acid	-0.302148	0.125579	0.302148	0.125579	-0.140929	0.48321	0.434451	0.0235468	-0.0885549	0.66049	-0.285921	0.148241	-0.133854	0.505654	0.657405	0.000194654	-0.0265042	0.895597	0.366965	0.0597178	-0.280664	0.156176	0.0363137	0.857293	0.271409	0.170869	0.102395	0.611299	-0.183511	0.35954	0.318989	0.104852	0.0257172	0.898681	0.211427	0.28976	0.155053	0.439969	0.313364	0.111468	-0.104995	0.602229	0.0556213	0.782891	-0.0291145	0.885378	-0.0155645	0.938581	0.0491321
Jasmine lactone	-0.201432	0.313685	-0.226611	0.255684	0.101648	0.613913	0.101882	0.613094	0.0709131	0.725226	0.15555	0.438487	-0.107083	0.594987	-0.200916	0.314952	0.12794	0.524802	-0.0425323	0.833167	-0.0243174	0.90417	-0.0726273	0.718846	-0.187147	0.34993	-0.08393	0.677255	-0.0671892	0.739148	0.478318	0.0116129	0.116717	0.562072	-0.0265811	0.895295	-0.122814	0.541674	-0.299573	0.128994	-0.135895	0.499127	-0.1842	0.357705	-0.327922	0.0949508	0.357984	0.0667404	-0.0524916
2-Ethoxyethanol	0.100716	0.617183	0.151074	0.451936	-0.102682	0.610294	0.0321249	0.873615	-0.389503	0.0446159	-0.197515	0.323384	-0.133854	0.505654	0.527939	0.00464961	0.205489	0.30383	0.330367	0.0923668	-0.218181	0.274264	-0.0726273	0.718846	0.31873	0.10515	0.138205	0.491792	-0.224664	0.259901	0.186822	0.350782	-0.183977	0.358298	0.238925	0.230053	0.0515821	0.798325	0.289613	0.142844	-0.225606	0.257855	0.279551	0.157893	-0.0931665	0.643932	-0.304559	0.12244	0.000419933
(4Z,7Z,10Z,13Z,16Z,19Z)-4,7,10,13,1 6,19-Docosahexaenoic acid	-0.327327	0.0955874	0	1	0.0978578	0.627257	0.195503	0.328437	0.0356295	0.859955	0.280886	0.155835	0.120469	0.54948	0.0894657	0.657208	-0.148227	0.460602	-0.268053	0.176431	-0.335715	0.0869014	-0.108941	0.588575	0.0183178	0.927742	-0.186325	0.35209	0.00629899	0.975124	0.434594	0.0234961	0.095945	0.634035	0.305836	0.120802	-0.00552665	0.978174	-0.394579	0.0416741	-0.476464	0.011987	0.0426189	0.832832	-0.197672	0.322991	0.347467	0.0757556	-0.0999439
Allantoate/Allantoic acid	-0.25179	0.205169	0.327327	0.0955874	-0.0630562	0.754693	0.412117	0.0326746	0.0688376	0.732975	-0.326208	0.0967938	-0.227552	0.253663	0.72	2.29598e-05	0.163933	0.413891	0.320476	0.103152	-0.0270194	0.893579	0.181568	0.364735	0.397497	0.0400538	0.365935	0.0604929	-0.171332	0.392835	0.270296	0.1727	0.0425323	0.833167	0.37183	0.0561616	0.13049	0.516502	0.283484	0.151883	0.0335584	0.868023	0.0252824	0.900385	0.103893	0.606065	-0.359246	0.0657169	0.237682
Pyridoxine	-0.226611	0.255684	-0.25179	0.205169	0.0206742	0.918476	-0.0783236	0.697779	0.256671	0.196229	0.158907	0.428544	0	1	-0.309008	0.116802	0.201235	0.314167	-0.125619	0.532412	0.143203	0.476107	-0.181568	0.364735	-0.231415	0.245472	-0.05987	0.766742	0.0348544	0.862973	0.209347	0.294641	0.265085	0.181452	-0.0641613	0.750527	-0.162115	0.41916	-0.32026	0.103398	0.00830655	0.9672	-0.315669	0.108721	-0.14496	0.470654	0.132088	0.511336	0.149916
Thymine	0.025179	0.900791	0.125895	0.531504	-0.205364	0.304133	0.137678	0.493459	-0.280539	0.156367	-0.228289	0.252085	0.0267708	0.894552	0.59084	0.00117464	0.154444	0.44179	0.128586	0.522693	-0.232704	0.242778	-0.0726273	0.718846	0.523889	0.00503596	0	1	-0.337206	0.0854229	0.486599	0.0100586	0.039565	0.844662	0.596089	0.00103389	-0.0033774	0.986661	0.00459703	0.981844	-0.344888	0.0781027	0.255713	0.197961	-0.201657	0.313135	-0.3176	0.106458	0.0600504
DL-Indole-3-lactic acid	-0.201432	0.313685	-0.025179	0.900791	-0.143341	0.475676	0.134007	0.505164	0.0224847	0.911363	0.0928825	0.644948	0	1	0.0629008	0.75528	0.162952	0.416731	0.00791299	0.968753	-0.151646	0.450205	-0.0363137	0.857293	0.019539	0.922939	-0.226611	0.255684	-0.113802	0.571944	0.449831	0.0185621	0.227499	0.253777	0.274366	0.166072	-0.290149	0.142073	-0.129483	0.519773	-0.26448	0.182487	-0.325782	0.0972561	-0.258966	0.192118	0.0685679	0.733984	-0.00167973
Stachyose	-0.025179	0.900791	0.201432	0.313685	-0.203296	0.309133	0.237724	0.232473	-0.43551	0.0231718	-0.156669	0.435159	-0.160625	0.423506	0.584428	0.00136883	0.139065	0.489073	0.47379	0.0125439	-0.0412045	0.838307	0.199725	0.317889	0.417341	0.0303197	0.162265	0.418725	-0.146556	0.465728	0.0957298	0.634799	-0.270031	0.173138	0.27681	0.16218	0.337433	0.0851994	0.318728	0.105152	0.00996786	0.960645	0.0931837	0.643871	-0.0897954	0.656021	-0.385327	0.0471582	-0.0407335
N-Acetylcadaverine	0.226611	0.255684	0.201432	0.313685	0.0396255	0.844427	0.100964	0.616312	0.0148745	0.9413	-0.421888	0.0283831	0.160625	0.423506	0.51542	0.00593265	-0.109616	0.586253	0.109793	0.585645	-0.053701	0.790219	-0.108941	0.588575	0.505877	0.00710107	0.0940016	0.640952	-0.305291	0.1215	0.14641	0.466177	-0.0524236	0.795103	0.34861	0.0747329	0.0669339	0.740105	0.260499	0.189407	-0.125595	0.53249	0.544655	0.00330949	-0.0162429	0.93591	-0.28605	0.14805	0.0478723
Creatine	-0.276969	0.16193	0.075537	0.708059	-0.10406	0.605483	-0.0559891	0.781489	0.130065	0.517882	-0.390554	0.0439938	-0.147239	0.463629	0.347786	0.0754689	0.26406	0.183209	0.192879	0.335097	-0.158401	0.430036	-0.308666	0.117228	0.152343	0.448101	0.178491	0.373056	-0.168813	0.399936	0.149723	0.456038	-0.0464888	0.817892	0.0919646	0.648232	-0.0973305	0.629122	0.350141	0.07338	-0.0930333	0.644408	0.15025	0.454436	0.0622132	0.757876	-0.165741	0.40869	-0.0755879
Anthranilic acid (Vitamin L1)	-0.327327	0.0955874	0.276969	0.16193	-0.260839	0.188808	0.0149916	0.940838	-0.180569	0.367425	0.0397268	0.844034	-0.214166	0.28341	0.402443	0.0374221	0.0700234	0.728545	0.269042	0.174779	-0.243512	0.22096	-0.181568	0.364735	-0.12334	0.539933	0.109109	0.587997	0.0902855	0.654258	-0.0665803	0.741432	-0.196836	0.325085	0.000916591	0.99638	-0.00245629	0.990299	0.218359	0.273863	-0.116624	0.562385	-0.236932	0.23408	0.196753	0.325292	-0.121571	0.545804	0.0881858
1-Palmitoyl-sn-glycero-3-phosphocholine	-0.327327	0.0955874	0.050358	0.803017	0.130936	0.515057	0.318496	0.10542	0.282615	0.153197	0.273612	0.167287	0.120469	0.54948	-0.218931	0.272577	-0.266351	0.179298	-0.465877	0.0143197	-0.275935	0.163566	-0.0181568	0.928376	-0.0329721	0.87031	-0.235004	0.238021	-0.0256159	0.899078	0.0798301	0.692242	0.268053	0.176431	0.139627	0.487301	0.0543454	0.787758	-0.301106	0.126953	-0.229593	0.249313	0.0881272	0.662034	-0.108796	0.589073	0.381961	0.0492885	-0.252799
Betaine	-0.050358	0.803017	-0.075537	0.708059	0.135071	0.501756	-0.166438	0.406695	0.254595	0.199997	0.0106311	0.958028	-0.0803123	0.690473	-0.196031	0.327107	-0.228721	0.251164	-0.30465	0.122323	0.241823	0.224279	-0.127098	0.527557	-0.462525	0.0151324	-0.0828109	0.681334	0.102464	0.611057	-0.0738677	0.714241	0.0939668	0.641076	-0.385885	0.046812	-0.130183	0.517498	-0.243643	0.220704	0.063462	0.753163	-0.353231	0.0707057	-0.0122588	0.951609	0.286892	0.146808	0.25196
Tauroursodeoxycholic acid	-0.276969	0.16193	0.25179	0.205169	0.00413484	0.98367	0.395901	0.0409333	-0.154971	0.440215	-0.113026	0.574585	-0.0267708	0.894552	0.651603	0.000231573	-0.0467913	0.816727	0.352128	0.0716514	-0.396171	0.0407834	0.127098	0.527557	0.253396	0.202196	0.138205	0.491792	-0.149076	0.458009	0.34052	0.0822035	-0.0524236	0.795103	0.272533	0.169035	0.245629	0.216846	0.290379	0.141743	-0.206335	0.301801	0.0498424	0.804996	0.107264	0.594361	-0.0214538	0.915413	-0.12304
Ascorbic acid 6-palmitate	-0.327327	0.0955874	0.25179	0.205169	-0.231895	0.244466	0.26679	0.178556	-0.324471	0.0986887	-0.0609891	0.762504	-0.0936977	0.642036	0.685191	8.03229e-05	0.0700234	0.728545	0.308607	0.117303	-0.328961	0.0938465	0.127098	0.527557	0.40635	0.0354423	0.128133	0.524172	-0.0331747	0.86952	0.358076	0.066665	-0.152325	0.448155	0.4696	0.01346	0.2269	0.255062	0.0842789	0.675984	-0.273119	0.168083	0.212372	0.287559	-0.0260499	0.897377	-0.207386	0.299289	0.0025196
N1-Methyl-2-pyridone-5-carboxamide	0.100716	0.617183	0.025179	0.900791	0.0348015	0.863179	-0.147163	0.463864	-0.217928	0.274835	-0.0190241	0.924964	-0.120469	0.54948	0.353282	0.0706619	0.247045	0.214123	0.418399	0.0298596	-0.156375	0.436034	0.0181568	0.928376	0.00671653	0.973476	0.269135	0.174623	0.0424132	0.833628	0.146742	0.465158	-0.292781	0.138328	-0.0030553	0.987933	-0.154439	0.441805	0.300339	0.12797	-0.0358843	0.858963	-0.16253	0.417955	0.0530191	0.792825	-0.199394	0.318709	0.12472
Erucamide	-0.151074	0.451936	0.226611	0.255684	-0.167461	0.403776	0.270155	0.172932	-0.0556928	0.782618	-0.0906444	0.652968	-0.0803123	0.690473	0.498321	0.0081585	0.195346	0.328834	0.199803	0.317696	-0.271545	0.170647	-0.199725	0.317889	0.350176	0.0733494	0.0134288	0.946996	-0.31159	0.113619	0.311702	0.113482	0.0662713	0.742592	0.588146	0.00125311	0.0399147	0.843305	0.163195	0.416027	-0.28641	0.147519	0.353953	0.0700916	-0.0266628	0.894975	-0.356301	0.0681242	0.0785274
.alpha.-Linolenoyl ethanolamide	-0.25179	0.205169	0.151074	0.451936	0.0282547	0.888742	0.351538	0.0721611	-0.109656	0.586116	0.25123	0.206212	0.133854	0.505654	0.22687	0.255126	-0.0330484	0.870012	-0.0583583	0.772477	-0.188798	0.345619	0.0544705	0.78728	0.293696	0.137043	0.0307743	0.878889	-0.0113382	0.955239	0.383251	0.0484635	0.207716	0.298504	0.491904	0.0091574	0.164878	0.411167	-0.262031	0.186723	-0.224941	0.259297	-0.000722354	0.997147	-0.130556	0.51629	0.0786638	0.696527	-0.0823068
L-Tyrosine	-0.327327	0.0955874	0.075537	0.708059	0.00861424	0.965986	0.161236	0.421719	0.0221387	0.912722	0.113585	0.57268	0.0535416	0.790828	0.260153	0.190017	0.13383	0.505732	-0.0544018	0.787542	-0.353278	0.0706657	-0.0907841	0.652466	0.141658	0.480927	-0.0436436	0.82887	-0.107503	0.593536	0.560467	0.00236046	0.258161	0.193553	0.418271	0.0299152	-0.163036	0.416486	-0.2582	0.193484	-0.387085	0.0460743	-0.149527	0.456633	-0.198285	0.321462	0.0235571	0.907153	0.0487122
Tyramine	-0.25179	0.205169	0.125895	0.531504	-0.00689139	0.972786	0.210801	0.291224	0.00172959	0.993169	-0.0156669	0.938178	0.133854	0.505654	0.389618	0.0445475	0.0670785	0.739563	-0.0425323	0.833167	-0.328623	0.0942045	-0.0181568	0.928376	0.42131	0.0286236	-0.0179051	0.929367	-0.140677	0.483999	0.563448	0.00221061	0.27102	0.171507	0.493737	0.00886212	-0.0503539	0.803033	-0.221424	0.267017	-0.290729	0.141241	0.0671789	0.739187	-0.240272	0.227358	-0.0471142	0.815484	0.0319149
trans-2-Hydroxycinnamic acid	-0.125895	0.531504	0.050358	0.803017	0.0947567	0.638261	0.107389	0.593929	0.0145285	0.942662	0.111907	0.578403	0.120469	0.54948	0.212214	0.287927	0.0634792	0.753098	-0.0949559	0.637551	-0.28573	0.148525	-0.127098	0.527557	0.174325	0.384497	-0.0727393	0.71843	-0.177212	0.376548	0.544567	0.00331557	0.232444	0.24332	0.420715	0.0288727	-0.211241	0.290194	-0.298041	0.131058	-0.413334	0.0321133	-0.109798	0.585628	-0.26295	0.185125	0.0260811	0.897255	0.0298152
D-Mannose	0.302148	0.125579	0.025179	0.900791	-0.0130936	0.948317	-0.202846	0.310229	0.0906304	0.653018	-0.0665844	0.741417	-0.147239	0.463629	-0.495267	0.00862176	-0.0729683	0.717579	-0.174086	0.385158	0.337742	0.0848957	0.181568	0.364735	-0.369715	0.0576872	-0.0570724	0.777365	0.110442	0.583416	-0.473349	0.0126378	0.0989124	0.623532	-0.622365	0.000527444	-0.263437	0.184283	0.220658	0.268718	0.506699	0.00699329	-0.356843	0.0676761	0.000919407	0.996369	0.103483	0.607496	0.101204
Riboflavin	-0.327327	0.0955874	0.075537	0.708059	0.132315	0.510604	0.269543	0.173945	-0.037705	0.851883	0.0581914	0.773111	0.0535416	0.790828	0.335878	0.0867393	-0.0997997	0.620405	-0.0276955	0.890931	-0.193526	0.333448	0	1	0.111128	0.581066	0.0229409	0.909572	-0.164194	0.41314	0.684021	8.35307e-05	0.117706	0.55874	0.334556	0.0880654	0.042064	0.834979	-0.337882	0.0847585	-0.367482	0.0593321	-0.161807	0.420055	-0.166106	0.407644	0.185091	0.355343	0.0659294
L-Pyroglutamic acid	-0.327327	0.0955874	0.075537	0.708059	-0.0434158	0.829751	0.278416	0.159659	0.000691835	0.997267	-0.0710607	0.724676	0.0669269	0.740132	0.473282	0.0126521	0.103072	0.608931	0.115728	0.565413	-0.230002	0.248447	-0.0181568	0.928376	0.516257	0.0058384	0.141002	0.48298	-0.244821	0.218411	0.668784	0.000136969	0.249259	0.209913	0.603422	0.000861874	0.107463	0.593674	-0.23828	0.231352	-0.244877	0.218301	0.130024	0.518016	-0.128717	0.522267	-0.100118	0.619287	0.0197368
Retinol (Vitamin A)	-0.327327	0.0955874	0.050358	0.803017	0.0537529	0.790021	0.205293	0.304301	0.071605	0.722649	0.188563	0.346231	0.0803123	0.690473	0.0946565	0.638617	-0.108634	0.589631	-0.152325	0.448155	-0.253306	0.202362	0.0544705	0.78728	0.086399	0.668286	-0.142681	0.477732	0.0768477	0.703217	0.523036	0.00512077	0.0425323	0.833167	0.239536	0.228828	-0.0620213	0.758601	-0.367763	0.0591231	-0.326613	0.0963552	-0.0736801	0.714937	-0.236288	0.235392	0.331482	0.0912071	0.0239362
S-Methyl-5-thioadenosine	0.302148	0.125579	-0.25179	0.205169	-0.170907	0.39403	-0.11565	0.565676	-0.0408183	0.839803	0.0207027	0.918364	0.0535416	0.790828	-0.408244	0.0345133	0.0569349	0.777888	-0.102869	0.60964	0.164143	0.413287	-0.0726273	0.718846	-0.451534	0.0180679	-0.213742	0.284389	-0.0298152	0.882638	-0.566429	0.00206902	0.0385758	0.848501	-0.31378	0.11097	-0.00890405	0.964842	0.239812	0.228275	0.0867203	0.667122	0.02456	0.903218	0.160283	0.424505	-0.0689886	0.732411	-0.162094
4-Guanidinobutyric acid	-0.327327	0.0955874	0.050358	0.803017	-0.111296	0.580491	0.056601	0.779159	-0.096857	0.6308	0.102954	0.609342	-0.0133854	0.947168	0.32458	0.0985686	0.182257	0.362887	-0.0445106	0.825522	-0.57889	0.00155828	-0.127098	0.527557	-0.050374	0.802956	-0.0615486	0.760387	-0.024776	0.902371	0.483618	0.0105968	0.118695	0.555416	0.31714	0.106993	-0.228128	0.25243	-0.071254	0.723956	-0.539261	0.0037002	0.0093906	0.962922	-0.0622132	0.757876	0.127881	0.524994	-0.112122
L-Tryptophan	-0.201432	0.313685	-0.025179	0.900791	-0.119221	0.553652	0.137984	0.49249	0.033554	0.86804	0.0928825	0.644948	0.0133854	0.947168	0.0970992	0.629941	0.157062	0.433995	0.0207716	0.918093	-0.151646	0.450205	-0.0544705	0.78728	0.0326668	0.871501	-0.17961	0.370017	-0.112122	0.577667	0.480305	0.0112227	0.227499	0.253777	0.303392	0.123953	-0.28278	0.152946	-0.149404	0.45701	-0.27179	0.170245	-0.32217	0.101242	-0.229545	0.249414	0.0685679	0.733984	0.0117581
trans-3-Coumaric acid	0.327327	0.0955874	-0.226611	0.255684	-0.0461723	0.819112	0.00734284	0.971004	0.0470448	0.815751	0.043084	0.831033	-0.0133854	0.947168	-0.343511	0.0793776	-0.00294491	0.988369	-0.190901	0.340173	0.247227	0.213775	0.181568	0.364735	-0.112655	0.57585	-0.118621	0.555664	-0.0239362	0.905666	-0.595247	0.00105543	-0.0712169	0.724094	-0.279866	0.157406	0.258832	0.192358	0.223722	0.261956	0.324288	0.0988903	0.130746	0.515674	0.185414	0.354491	-0.0992763	0.622249	-0.153275
4-Aminobutyric acid	-0.226611	0.255684	0.25179	0.205169	-0.0523746	0.795291	0.222427	0.264801	0.120379	0.549778	-0.16786	0.40264	-0.267708	0.177009	0.146565	0.465702	-0.0235593	0.907145	0.0138477	0.945345	0.134421	0.503836	0.34498	0.0780181	-0.0992215	0.622442	0.245635	0.216834	0.196948	0.324802	-0.387226	0.0459885	0.208705	0.296158	-0.249313	0.209812	0.238874	0.230155	0.38232	0.0490579	0.457857	0.016327	-0.205871	0.302913	0.301259	0.12675	-0.0824498	0.682652	0.163774
Acetylcarnitine	0.201432	0.313685	-0.151074	0.451936	-0.202262	0.311652	-0.200704	0.315473	-0.187833	0.348134	0.0173455	0.931569	-0.0401562	0.842369	-0.32	0.103694	-0.224468	0.260329	-0.00989124	0.960947	0.154686	0.441067	-0.181568	0.364735	-0.22592	0.257176	-0.352506	0.0713265	-0.110442	0.583416	-0.378613	0.0514824	-0.192879	0.335097	-0.405744	0.0357438	-0.0964094	0.632387	0.196906	0.324908	0.0129582	0.948851	-0.142304	0.478909	-0.176526	0.378427	0.155645	0.438205	-0.0986841
3-Hydroxy-4-methoxycinnamic acid	0.226611	0.255684	-0.302148	0.125579	0.14403	0.473535	-0.216614	0.277812	0.139751	0.486912	0.28704	0.14659	0.0401562	0.842369	-0.737099	1.15783e-05	-0.188147	0.347315	-0.227499	0.253777	0.379622	0.0508135	0.0726273	0.718846	-0.271714	0.17037	-0.200872	0.31506	0.291853	0.13964	-0.493224	0.00894391	-0.00494562	0.980468	-0.446685	0.019504	-0.0890405	0.658739	-0.0996024	0.6211	0.463505	0.0148908	-0.239822	0.228256	0.049035	0.808096	0.257445	0.194835	-0.0898656
DL-3-Hydroxybutyric acid	-0.25179	0.205169	0.201432	0.313685	0.0189513	0.92525	0.293102	0.137877	0.110694	0.582554	-0.16786	0.40264	-0.214166	0.28341	0.152672	0.447111	0.0157062	0.938023	0.0138477	0.945345	0.191837	0.337764	0.34498	0.0780181	-0.117845	0.558272	0.261861	0.187019	0.196948	0.324802	-0.289839	0.142518	0.341248	0.0815091	-0.239536	0.228828	0.280324	0.156698	0.439017	0.0219651	0.467825	0.0138645	-0.21165	0.28924	0.316276	0.108006	0.0067306	0.973421	0.137318
Adenosine	0.226611	0.255684	-0.327327	0.0955874	0.194682	0.330512	-0.149916	0.45545	0.121763	0.545166	0.0207027	0.918364	0.133854	0.505654	-0.448855	0.0188503	0.0467913	0.816727	-0.000989124	0.996093	0.157388	0.43303	0.217882	0.274939	-0.223783	0.261824	-0.0408459	0.839696	0.273376	0.167668	-0.388551	0.0451861	0.219586	0.27111	-0.387718	0.0456891	0.0586439	0.771393	0.216827	0.277328	0.539593	0.00367505	0.0397295	0.844024	0.16059	0.423608	0.0769812	0.702724	-0.24734
L-Carnitine	0.125895	0.531504	-0.226611	0.255684	-0.0117154	0.953752	-0.0510939	0.800195	0.0889009	0.659243	-0.092323	0.646949	-0.133854	0.505654	-0.196031	0.327107	-0.071005	0.724884	0.0415432	0.836995	0.237095	0.233749	-0.272352	0.169329	-0.141658	0.480927	-0.0654654	0.74562	-0.327547	0.095351	-0.100367	0.618409	-0.0148369	0.941448	-0.262145	0.186524	-0.0488188	0.808927	0.0957715	0.634651	0.0734299	0.715865	-0.176977	0.377191	-0.0989894	0.62326	0.13966	0.487198	-0.191909
Glycerophosphocholine	0.201432	0.313685	-0.100716	0.617183	0.135071	0.501756	-0.00367142	0.9855	0.348339	0.0749743	0.0134288	0.946996	0.0267708	0.894552	-0.627786	0.000455613	-0.0503907	0.802892	-0.291792	0.139727	0.205009	0.304986	0	1	-0.335216	0.0874012	-0.364256	0.0617724	-0.0663493	0.742299	-0.317333	0.106769	0.150347	0.454141	-0.534983	0.00403738	-0.209092	0.295244	0.143274	0.475884	0.201683	0.31307	-0.0715131	0.722991	-0.106038	0.598606	0.314655	0.109923	-0.225924
Matairesinol	0.201432	0.313685	-0.276969	0.16193	0	1	-0.394983	0.0414462	0.226922	0.255015	-0.0559533	0.781625	0.0803123	0.690473	-0.607939	0.000768789	-0.0870384	0.66597	-0.360041	0.0650779	0.268843	0.17511	-0.0544705	0.78728	-0.245459	0.217175	-0.0425245	0.833197	0.043673	0.828757	-0.384576	0.0476271	0.0563801	0.78	-0.446685	0.019504	-0.01658	0.934582	-0.219891	0.270426	0.384427	0.0477204	0.0729578	0.717618	0.114313	0.570207	-0.0176678	0.9303	0.142777
Choline	-0.25179	0.205169	0.176253	0.379177	-0.0410038	0.839084	0.400491	0.0384438	0.125568	0.532578	-0.141562	0.481227	-0.0535416	0.790828	0.367939	0.0589922	0.244427	0.219174	0.0128586	0.949244	-0.359357	0.0656267	0	1	0.250343	0.207871	0.0967992	0.631004	-0.219625	0.271023	0.432275	0.0243328	0.411476	0.0329735	0.355637	0.0686761	0.0620213	0.758601	-0.0145573	0.942549	-0.160482	0.423922	0.167586	0.403419	0.0677296	0.737123	0.0618373	0.759296	-0.110862
L-Glutamine	-0.201432	0.313685	0.176253	0.379177	-0.127835	0.525144	0.309317	0.116418	-0.140789	0.483651	0.0330125	0.870152	0.267708	0.177009	0.386565	0.0463928	0.252608	0.203652	0.266074	0.179767	-0.57281	0.00179192	0.181568	0.364735	0.21096	0.290851	0.0374887	0.852724	0.012178	0.951927	0.371326	0.0565225	0.33828	0.0843687	0.497709	0.00824962	-0.0448273	0.824299	0.121821	0.544972	-0.342562	0.0802664	0.126412	0.529806	0.160283	0.424505	-0.143446	0.47535	-0.254479
Oleic acid	-0.327327	0.0955874	0.276969	0.16193	-0.130936	0.515057	0.307175	0.119101	-0.166386	0.406842	0.0486794	0.809463	-0.0936977	0.642036	0.561221	0.00232173	0.0965276	0.631967	0.148369	0.460169	-0.278975	0.158788	0	1	0.540681	0.00359373	0.200872	0.31506	-0.102044	0.612527	0.264996	0.181604	-0.0494562	0.806478	0.633364	0.000390782	0.264358	0.182697	-0.017622	0.930481	-0.169121	0.399063	0.197203	0.324165	0.0459703	0.81989	-0.299511	0.129077	0.0285554
L-Aspartate	-0.327327	0.0955874	0.201432	0.313685	-0.0148165	0.941528	0.311153	0.114153	0.0695295	0.730389	-0.170658	0.39473	0.17401	0.385368	0.470534	0.0132511	0.0317396	0.87512	0.00890212	0.96485	-0.249929	0.20865	0	1	0.460388	0.01567	0.0111907	0.955821	-0.180151	0.368554	0.553179	0.00276392	0.326411	0.0965739	0.50443	0.00729404	0.0822857	0.683251	-0.184647	0.356519	-0.269464	0.174076	0.135803	0.499422	-0.116152	0.563979	-0.0525828	0.794494	0.0134378
DL-Methionine sulfoxide	-0.176253	0.379177	0.100716	0.617183	-0.116465	0.562922	0.222121	0.265476	-0.0709131	0.725226	0.0408459	0.839696	0.147239	0.463629	0.403664	0.036794	-0.0638064	0.751865	-0.0741843	0.713067	-0.292822	0.13827	-0.0363137	0.857293	0.498855	0.00807959	-0.0016786	0.99337	-0.283035	0.152561	0.553179	0.00276392	0.142434	0.478502	0.686526	7.67941e-05	0.0715394	0.722893	-0.288847	0.143953	-0.406024	0.0356043	0.156028	0.437063	-0.160896	0.422712	-0.0975936	0.628191	-0.0260358
1-Aminocyclopropanecarboxylic acid	-0.327327	0.0955874	0.075537	0.708059	-0.0620225	0.758596	0.282087	0.153998	0.000691835	0.997267	-0.085049	0.673184	0.0535416	0.790828	0.476947	0.0118886	0.118124	0.557335	0.115728	0.565413	-0.22291	0.263738	-0.0181568	0.928376	0.512594	0.0062604	0.141002	0.48298	-0.244821	0.218411	0.689321	6.98508e-05	0.249259	0.209913	0.593034	0.00111391	0.0967164	0.631298	-0.235215	0.237587	-0.238564	0.230779	0.130024	0.518016	-0.143734	0.474455	-0.0896011	0.65672	0.0298152
D-Proline	-0.25179	0.205169	0.075537	0.708059	-0.151266	0.451354	0.303504	0.123807	0.0740264	0.713652	-0.151633	0.450243	-0.0133854	0.947168	0.335573	0.0870442	0.111907	0.578403	0.0365976	0.856188	-0.234731	0.238583	-0.0907841	0.652466	0.393222	0.0424447	-0.0940016	0.640952	-0.260358	0.189655	0.518399	0.00560304	0.42928	0.0254492	0.485793	0.0102018	-0.0432921	0.830229	-0.0727864	0.718255	-0.236903	0.23414	0.228986	0.250601	-0.285016	0.149586	-0.0180885	0.928645	0.107503
20-Hydroxyarachidonic acid	-0.327327	0.0955874	-0.25179	0.205169	-0.182622	0.361911	-0.0446689	0.82491	0.131795	0.512282	0.247873	0.212542	-0.281093	0.155516	-0.464122	0.0147405	-0.0559533	0.781626	-0.113749	0.572122	-0.0398535	0.843543	0.0907841	0.652466	-0.419478	0.0293966	-0.325648	0.0974012	0.148236	0.460574	-0.124217	0.537033	0.179031	0.371587	-0.338833	0.0838305	-0.0914968	0.649909	-0.00766172	0.969745	0.258832	0.192357	-0.307	0.119322	-0.0174687	0.931084	0.336109	0.086509	-0.031075
Xanthine	-0.25179	0.205169	0.226611	0.255684	-0.116809	0.56176	0.267402	0.177524	-0.104121	0.60527	-0.0117502	0.953614	0.120469	0.54948	0.475115	0.0122654	0.0664241	0.742019	0.0346193	0.863889	-0.347199	0.0759972	0	1	0.387727	0.0456835	0.0872872	0.66507	-0.194429	0.331154	0.637647	0.000346635	0.247281	0.213672	0.571036	0.00186555	-0.0187292	0.926124	-0.195374	0.328762	-0.335584	0.0870322	0	1	-0.0968442	0.630845	-0.0475348	0.813865	0.0734882
Deoxyadenosine	0.025179	0.900791	-0.276969	0.16193	0.192614	0.335774	-0.0480344	0.811943	0.175034	0.382533	0.320612	0.102997	0.0803123	0.690473	-0.45771	0.0163658	-0.121723	0.5453	-0.276955	0.161952	0.169884	0.396908	0.145255	0.469742	-0.382842	0.0487236	-0.1673	0.404233	0.318729	0.105151	-0.226572	0.255769	0.139466	0.487807	-0.258479	0.192986	0.068162	0.735503	-0.280419	0.156552	0.150515	0.453632	-0.136525	0.497121	0.0484221	0.810452	0.270486	0.172386	0.0205767
[truncated: 261 more columns]
